1 **Long-read assembly of the *Aedes aegypti* genome reveals the**  
2 **nature of heritable adaptive immunity sequences**

3

4 Zachary J. Whitfield<sup>1\*</sup>, Patrick T. Dolan<sup>1\*</sup>, Mark Kunitomi<sup>1\*#</sup>, Michel Tassetto<sup>1</sup>,  
5 Matthew G. Seetin<sup>2</sup>, Steve Oh<sup>2</sup>, Cheryl Heiner<sup>2</sup>, Ellen Paxinos<sup>2</sup>, and Raul  
6 Andino<sup>1</sup>

7

8 <sup>1</sup> Department of Microbiology and Immunology, University of California, 600 16<sup>th</sup>

9 Street, GH-S572, UCSF Box 2280, San Francisco, California 94143-2280, USA.

10 <sup>2</sup> Pacific Biosciences, 1305 O'Brien Drive, Menlo Park, California, 94025, USA.

11 \*These authors contributed equally to this work

12 # Current address: IBM Almaden Research Center, 650 Harry Road, San Jose,

13 California, 95120-6099, USA.

14 To whom correspondence should be addressed. E-mail: [raul.andino@ucsf.edu](mailto:raul.andino@ucsf.edu)

15

16 Abstract

17       The *Aedes aegypti* mosquito is a major vector for arboviruses including  
18 dengue, chikungunya and zika. Combating the spread of these viruses requires a  
19 more complete understanding of mosquito-virus interactions. Recent studies  
20 have implicated DNA derived from non-retroviral RNA viruses in insect immunity.  
21 To better define the role and origin of these elements, we generated a high-  
22 quality assembly of the *Ae. aegypti*-derived Aag2 cell line genome using single-  
23 molecule, real-time sequencing technology. The new assembly improves  
24 contiguity by one to two orders of magnitude with respect to previously released  
25 assemblies. This improved quality enables characterization of the collection of  
26 Endogenous Viral Elements (EVEs) in the mosquito genome, providing insight  
27 into their integration and role in mosquito immunity. Additionally, we find a distinct  
28 repertoire of EVEs present in the genomes of *Ae. aegypti* and *Ae. albopictus*,  
29 suggesting the intriguing possibility that differences in EVE composition may play  
30 a role in establishing vector competence.

31

32

33

## 34 **Introduction**

35

36 Mosquito transmission of arboviruses such as Dengue virus (DENV),  
37 Chikungunya virus (CHIKV), and the newly emerging Zika virus causes  
38 widespread and debilitating disease across the globe (Bhatt et al., 2013). The  
39 primary vector of these viruses, *Aedes aegypti*, has a global tropical/subtropical  
40 distribution (Kraemer et al., 2015) creating geographically isolated populations of  
41 *Ae. aegypti* that have diversified over time. This genetic diversity has resulted in  
42 differential competence for vectoring virus (Bennett et al., 2002). Comparative  
43 genomics may explain these differences in vector competence between *Ae.*  
44 *aegypti* populations. However, this comparison is limited by the repetitive nature  
45 of the *Ae. aegypti* genome and the absence of an assembly based on long-read  
46 sequencing capable of spanning these regions. The underlying genetic  
47 contributions to vector competence are of critical importance to understanding  
48 the epidemiology of both acute epidemics as well as endemic occurrences of  
49 arbovirus infection.

50

51 One critical factor underlying vector competence is the insect immune  
52 system (Kramer, 2016; Kramer & Ciota, 2015). However, the connection between  
53 the mosquito immune system, tolerance to viral infection, and vector competence  
54 at a genomic level is still unclear. At their core, insects make use of an RNAi-  
55 based immune defense, where foreign viral dsRNA intermediates are recognized  
56 and processed through a dicer and argonaute mediated pathway, leading to  
57 cleavage of viral RNA and protection from infection (Mongelli & Saleh, 2016). In  
58 addition, mosquitoes utilize an additional RNAi pathway mediated by Piwi  
59 proteins and piRNAs as an antiviral defense system (Miesen, Joosten, & van Rij,  
60 2016). Previous reports have indicated piRNAs can be produced from virus  
61 derived DNA sequences, and identified a set of proteins responsible for their  
62 processing and maturation (Goic et al., 2016; Miesen, Girardi, & van Rij, 2015;  
63 Miesen, Ivens, Buck, & van Rij, 2016; Miesen, Joosten, et al., 2016). Given that

64 endogenous viral elements (EVEs) (Katzourakis & Gifford, 2010) are capable of  
65 producing piRNAs (Arensburger, Hice, Wright, Craig, & Atkinson, 2011), we  
66 propose that rigorous EVE identification and examination in *Ae. aegypti* is central  
67 to understand arbovirus/vector interaction. However, due to the highly repetitive  
68 nature of the *Ae. aegypti* genome and EVEs' tendency to cluster within such  
69 repetitive regions, many EVEs are likely to be missing from the current *Ae.*  
70 *aegypti* assemblies, which are based on relatively short read lengths (Nene et al.,  
71 2007; Vicoso & Bachtrog, 2015).

72 Accordingly, we sought to generate a *de novo* genome assembly using  
73 long read deep sequencing, which is more suited to characterize the many  
74 repetitive regions that make up the majority of the *Ae. aegypti* genome. The  
75 resulting assembly greatly improves our understanding of the *Ae. aegypti*  
76 genome, a foundational tool for studying arboviral disease, spread, and  
77 prevention. As a demonstration of its utility, we use this improved assembly to  
78 characterize the structure and composition of EVE-containing loci across the  
79 entire *Ae. aegypti* genome.

80

## 81 **Sequencing and Assembly of the Aag2 Genome**

82 Current assemblies of the *Ae. aegypti* genome are based on two  
83 sequencing strategies: one produced with the Illumina sequencing platform (to be  
84 referred to as 'UCB') (Vicoso & Bachtrog, 2015) and one based on conventional  
85 Sanger sequencing (to be referred to as 'LVP') (Nene, et al., 2007). In all  
86 instances, the Liverpool strain of *Ae. aegypti* was sequenced (Table 1). A more  
87 recent study used Hi-C to further organize the sanger-based *Ae. aegypti*  
88 assembly into chromosome level scaffolds (Dudchenko et al., 2017). Long-read  
89 assembly will further aid these efforts by reading through and resolving large  
90 repetitive regions unable to be identified by previous methods. To this end, we  
91 employed single-molecule, real-time sequence technology (Pacific Biosystems)  
92 to generate long read sequences of the genome of the cell line Aag2. Of note,  
93 the *Ae. aegypti*-derived Aag2 cell line is an important, widely used tool in the  
94 study of *Ae. aegypti* biology and its associated arboviruses. Here, we present the

95 draft assembly of the Aag2 genome and use it to map endogenous viral elements  
96 (EVEs) genome-wide.

97

98         Approximately 76-fold coverage of the *Ae. aegypti*-based Aag2 genome  
99 was achieved using the Single Molecule Real Time (SMRT) sequencing platform  
100 (P6/C4 chemistry) to shotgun sequence 116 SMRT cells generating 92.7 GB of  
101 sequencing data with an average read length of 15.5 kb. We used Falcon and  
102 Quiver to generate a *de novo* 1.7 Gbp assembly with a contig N50 of ~1.4 Mbp.

103

104         Our assembly improves upon previous *Aedes* assemblies as measured by  
105 N50, L50, and simply by the number of contigs (Table 1 and Figure 1). The long-  
106 read sequencing approach enabled a substantial improvement in assembly  
107 contiguity (Figure 1a). A majority of the Aag2 assembly sequence is found on  
108 contigs 10-100x longer than previous assemblies. This increased contiguity  
109 allows the mapping of numerous contigs from the initial LVP assembly to single  
110 Aag2 contigs (Figure 1b and c), and makes for an overall more complete and  
111 much more ordered genome assembly for use in downstream processes. In this  
112 report, we focused on examining repetitive regions of the genome, and as  
113 expected, uncovered a plethora of Endogenous Viral Elements (EVEs). These  
114 EVEs were found to produce *bona fide* small RNAs, and were organized into loci  
115 akin to a CRISPR-like system(de Vanssay et al., 2012).

116

### 117 **Repetitive nature of the Aag2 genome**

118         The genome of *Ae. aegypti* was previously shown to contain high  
119 proportions of repeat-DNA (Nene, et al., 2007). The *Ae. aegypti*-derived Aag2  
120 genome is no different, and is comprised of almost 55% repeat sequence (Table  
121 1 and Table 2). Our sequencing strategy allows more repeats to be sequenced  
122 within a single read, and therefore better reflects the structure and organization  
123 of these repetitive elements. Direct alignment of contigs in the Aag2 assembly  
124 and those of previous *Ae. aegypti* assemblies reveal resolved rearrangements  
125 and distinct repeated regions that were collapsed into single sequences in the

126 previous assemblies (Figure 1c and d). These regions can span 10-20kb  
127 (uncollapsed), illustrating the need for long read lengths to properly order the  
128 vast amount of repetitive regions in the *Ae. aegypti* genome. Of these repetitive  
129 regions, over 75% is made up of transposon-derived sequence (Table 2).

130

### 131 **Transposon-derived sequences in the *Ae. aegypti* genome**

132 Transposable elements (TEs) play important roles in gene regulation and  
133 genome evolution, providing a source of genomic variation that is a driver of  
134 evolution (Gifford, Pfaff, & Macfarlan, 2013; Thompson, Macfarlan, & Lorincz,  
135 2016). TEs account for a large portion of the *Aedes aegypti* genome and our  
136 long-read assembly allows us to explore the large-scale structure of these  
137 prominent features (Figure 2a and b). Individual contigs of the Aag2 assembly  
138 contained on average a significantly higher number of transposons than  
139 previously observed in the other two assemblies (Figure 2c).

140

141 The TEs in the Aag2 genome are derived from a number of different  
142 families and distributed throughout the genome (Figure 2a, d , Figure 2-Figure  
143 Supplement 1). However, the distribution of TEs is not completely uniform across  
144 the genome (Figure 2e). Local density plots reveal regions where particular TE  
145 classes are overrepresented, likely reflecting integration site bias and/or piRNA  
146 cluster formation (discussed below). Kimura distribution analysis (Kimura, 1980)  
147 of TEs in the Aag2 genome shows a relatively recent expansion of TEs,  
148 particularly LINE, LTR, and MITEs elements (Figure 2f; low Kimura scores  
149 indicate TEs that are closer to the element's consensus sequence, while higher  
150 scores indicated more diverged TE sequences). With our assembly a resource  
151 particularly suited for repeat identification and analysis has been produced.

152

### 153 **Identification of EVEs**

154 Given their propensity to integrate into repetitive TE clusters (Figure  
155 3b)(Parrish et al., 2015), our understanding of the EVE composition and structure  
156 has been limited. We thus used our improved long-read assembly genome to

157 better define the complete set of EVEs contained within the Aag2 genome,  
158 hereby called the “EVEome”. Using a BLASTx-based approach (see Methods),  
159 we searched for all EVE sequences within the newly assembled Aag2  
160 genome. A total of 368 EVEs were identified in the Aag2 assembly (Figure 3a).  
161 We were able to detect EVEs derived from at least 8 viral families, dominated by  
162 sequences derived from Rhabdoviridae, Flaviviridae, and Chuviridae (Figure 3c).  
163

164         Given that TE clusters have been shown to produce piRNAs, we next  
165 examined the populations of these small RNAs mapping to EVEs across the  
166 entire Aag2 genome (Figure 3a, b, and d). While only a small proportion of *Ae.*  
167 *aegypti* TE elements produce piRNAs (Arensburger, et al., 2011), we observed  
168 281 EVEs (73.2% of all EVEs) each producing at least 10 (Figure 3a, red lines).  
169 Characterization of these EVE piRNAs suggest they are *bona fide* piRNAs  
170 because they are methylated (resistant to  $\beta$ -elimination), present a 5' U bias, and  
171 range in size from 24 to 30 nucleotides) (data not shown). Furthermore, when  
172 compared to the previous *Ae. aegypti* assemblies,  $\sim 2 \times 10^6$  more piRNAs could be  
173 mapped to the more contiguous Aag2 assembly (Figure 3d), indicating our  
174 assembly gives a more complete tool for the study of the EVE composition within  
175 repetitive regions of the genome. With their propensity to produce mature  
176 piRNAs, and their integration in the *Ae. aegypti* genome, we speculate that EVEs  
177 comprising the “EVEome” represent a collection of adaptive immune “cassettes”  
178 in *Ae. aegypti*, some of which could function anti-virally.

179

### 180 **Insights into the mechanism of EVE integration**

181         DNA derived from RNA viruses is produced in persistently infected  
182 *Drosophila* cell lines (Goic et al., 2013) and in infected *Aedes albopictus*  
183 mosquitoes (and multiple mosquito-derived cell culture lines) (Goic, et al., 2016).  
184 This viral DNA (vDNA) synthesis depends on the activity of endogenous reverse  
185 transcriptases (Goic, et al., 2016; Goic, et al., 2013). Further, sequencing of viral  
186 DNA isolated from *Drosophila* cell lines (Goic, et al., 2013) has demonstrated  
187 formation of DNA hybrids between viral DNA sequences and transposable



188 elements. EVEs are typically found nearby transposons and can be found within  
189 piClusters (Figure 3a and b) (Feschotte & Gilbert, 2012; Honda & Tomonaga,  
190 2016; Miesen, Joosten, et al., 2016). Together this information suggests that  
191 EVEs are generated and integrated into the host genome in the context of the  
192 replication cycle of endogenous transposable elements. To determine whether a  
193 particular transposable element type is responsible for EVE integration, we  
194 identified TEs whose coordinates in the genome directly overlap EVE sequences  
195 (as called by RepeatMasker and BLASTX respectively). This approach identifies  
196 mobile elements most likely responsible for genomic integration of non-retroviral  
197 virus sequence. In line with observations in *Ae. albopictus* (X. G. Chen et al.,  
198 2015), LTR retrotransposons were found to be greatly enriched near EVEs  
199 (Figure 4-Figure Supplement 1 (i)). A similar pattern was observed when  
200 classifying the nearest upstream and downstream (non-overlapping) TE  
201 sequences around each EVE (Figure 4a(i)). These results further implicate LTR  
202 retrotransposons in the acquisition of EVEs and indicate that the typical  
203 integration sites are composed of clusters of similar LTR retrotransposons.

204

205 Strikingly, a vast majority of these LTR TEs shared the same  
206 strandedness as their nearest EVE. Of 571 (non-overlapping) TEs with the same  
207 strandedness as their nearest EVE, 419 were LTRs (Figure 4a(i); p-value =  
208  $3.42 \times 10^{-188}$  by one-sided binomial test). This bias is consistent with a copy-  
209 choice mechanism of recombination between LTR retrotransposon sequence  
210 and viral RNA leading to EVE integration, as previously proposed (Cotton,  
211 Steinbiss, Yokoi, Tsai, & Kikuchi, 2016; Geuking et al., 2009). Our analysis of  
212 transposons in the Aag2 genome shows LTR-retrotransposons display less  
213 diversity (by Kimura Divergence score; Figure 2f), indicating that they are  
214 currently (or were recently) actively replicating in the Aag2 cell line. Consistent  
215 with this idea, LTR-retrotransposon transcripts and proteins are readily detected  
216 in Aag2 cells (Maringer et al., 2017). We thus conclude that LTR-  
217 retrotransposons are responsible for the acquisition of the majority of EVEs  
218 observed in the *Ae. aegypti* genome.



219

220           Within the LTR retrotransposon family, both Ty3/gypsy and Pao Bel TEs  
221 are enriched surrounding EVEs (Figure 4a iv,v). Again, this enrichment for  
222 Ty3/gypsy and Pao Bel elements near EVE loci is strongest when the EVE and  
223 TE are in the same orientation (p-value =  $7.99 \times 10^{-23}$  and  $2.00 \times 10^{-3}$   
224 respectively). The drastic reduction in associated transposons based on  
225 directionality is not observed for other TE categories (Figure 4a, iii, vi). These  
226 data support Ty3/gypsy (and to a lesser extent Pao Bel) as the primary  
227 transposon type facilitating EVE genomic integration in *Ae.*  
228 *aegypti*. Interestingly, an association between LTR Ty3/gypsy elements and  
229 integrated viral sequence has also been observed previously in plants (Lee,  
230 Nolan, Watson, & Tristem, 2013; Staginnus et al., 2007), suggesting a conserved  
231 mechanism for the acquisition of invading virus sequences and generation of  
232 EVEs.

233

234           EVE-proximal TEs of the Ty3/gypsy and Pao Bel families can be further  
235 partitioned into individual elements. Of these, many specific elements were  
236 enriched for being the nearest TE to an EVE (Figure 4a(iv, v)). Interestingly,  
237 EVEs derived from different virus families show different patterns of enrichment  
238 for nearby TEs (Figure 4b). Both Flaviviridae and Rhabdoviridae-derived EVEs  
239 show strong enrichment for Ty3/gypsy transposable elements, while Chuviridae-  
240 derived EVEs are most typically adjacent to Pao Bel elements. Of the Ty3  
241 elements near Rhabdoviridae and Flaviviridae-derived EVEs, Ele152 is most  
242 enriched near Flaviviridae sequences, while Ty3/gypsy Ele134 and Ele135 are  
243 most closely associated with Rhabdoviridae EVE sequences. We hypothesize  
244 these data reflect the particular mobile elements whose replication overlapped  
245 with a given RNA virus' replication (in both space and time).

246

247           The strong enrichment for multiple LTRs around EVEs (Figure 3b, 4a,  
248 Figure 4-Figure Supplement 1), as well as the presence of EVE-derived piRNAs  
249 (Figure 3a), are consistent with previous observations that EVEs integrate into

250 piRNA clusters (Parrish, et al., 2015). We identified 469 piRNA-encoding loci  
251 (piClusters) using proTRAC (Rosenkranz, Rudloff, Bastuck, Ketting, & Zischler,  
252 2015; Rosenkranz & Zischler, 2012), accounting for 5,774,304 bp (0.335%) of  
253 the genome. Depending on the mapping algorithm used, between 63% (bowtie)  
254 and 77% (sRNAmapper.pl, see Methods) of beta-eliminated small RNAs from  
255 Aag2 cells mapped to these loci. Of the identified piClusters, 66 (14.1%) have  
256 EVE sequences associated with them and 65 of these piCluster-resident EVE  
257 sequences act as the template for piRNAs. Of the 384 EVEs identified, 256  
258 (66.7%) or 280,475 bp of the 411,239 EVE bp mapped to piClusters (68.2%,  
259 Fisher's test  $p < 2.2e-16$ , OR=203.42). Furthermore, a vast majority of piRNAs  
260 which map to EVEs are anti-sense to the EVE itself (544,429/547,014; 99.5%),  
261 consistent with the idea that EVEs produce functional piRNAs and are selected  
262 through evolution for their antiviral potential.

263

264 EVE/TE piRNA clusters are typically found in unidirectional orientations  
265 (Figure 3b, Figure 3-Figure Supplement 1), and strikingly, some LTR/EVE  
266 clusters have 'crowded out' almost all other transposons in the same region  
267 (Figure 3b). We hypothesize these TE/EVE clusters are the result of canonical  
268 piRNA cluster formation (Yamanaka, Siomi, & Siomi, 2014), with the rare  
269 occurrence of LTR-facilitated EVE integration, resulting in localized genomic  
270 expansion (due to non-random LTR integrase directed integration)(Lesbats,  
271 Engelman, & Cherepanov, 2016). These data together support the notion that  
272 EVEs are located at specific genomic loci associated with high piRNA production.

273

#### 274 **EVEs in *Ae. aegypti* and *Aedes albopictus***

275 If EVEs serve as a representative record of viral infection over time, and  
276 the majority are a 'recent' acquisition (based on Ty3/gypsy's low Kimura  
277 Divergence scores (Figure 2-Figure Supplement 2)), we hypothesized that EVEs  
278 present in two different species of mosquito would also differ (particularly given  
279 the relatively rare occurrence of genome fixation) (Holmes, 2011; Katzourakis &  
280 Gifford, 2010). The *Ae. aegypti* and *Ae. albopictus* species of mosquito occupy

281 distinct (yet overlapping) regions around the globe (Kraemer, et al., 2015) and so  
282 have not faced the exact same viral challenges over time. While the EVEs  
283 present in the Aag2 and LVP *Ae. aegypti*-based genomes correspond well, *Ae.*  
284 *aegypti* and *Ae. albopictus* do not share any specific EVEs. However, exploring  
285 the Flaviviridae family of viruses in greater detail, the viral species from which  
286 these EVEs are derived do partially overlap (Figure 5a). However, the relative  
287 abundance of EVEs derived from various viral species in *Ae. aegypti* and *Ae.*  
288 *albopictus* differs. The lack of specific EVEs in common between the mosquito  
289 genomes indicates EVE acquisition by *Ae. aegypti* and *Ae. albopictus* occurred  
290 post-speciation, an important factor when considering any differences in vector  
291 competence between these two species.

292

293 We next determined whether any particular region of the virus genome is  
294 more frequently acquired and converted into EVEs. EVEs were mapped to the  
295 locations of the viral ORFs from which they originate (Figure 5b). Interestingly,  
296 EVEs deriving from Flaviviridae primarily map toward the 5' end of the single  
297 Flaviviral ORF, leaving a relative dearth of EVEs at the 3' end. EVEs deriving  
298 from Rhabdoviridae primarily originate from the Nucleoprotein (N) and  
299 Glycoprotein (G) coding sequences, with only a few originating from the RNA-  
300 dependent RNA polymerase (L). The lack of EVEs mapping to the polymerase  
301 may be the result of RNA expression levels, with L being the least expressed  
302 gene (Conzelmann, 1998). This suggests that the template for cDNA synthesis  
303 and recombination with a TE genome are viral mRNAs. The lack of EVEs  
304 originating from the Phosphoprotein (P) or Matrix protein (M) is more difficult to  
305 explain, potentially reflecting the localization and/or availability of the RNA  
306 species for recombination. Interestingly, EVEs derived from Chuviridae primarily  
307 map to the ORF of the Glycoprotein. Given the complex and diverse nature of  
308 Chuviridae genomes (which include unsegmented, bi-segmented, and possibly  
309 circularized negative-sense genomes)(Li et al., 2015), this pattern could also be  
310 the result of RNA abundance. Within each ORF however, there is no obvious

311 selection for EVEs from a particular location. Rather, EVEs map to regions  
312 evenly distributed across their respective ORFs.

313

314 We next analyzed the Kimura divergence scores for TEs closest to (but  
315 not overlapping) EVEs (both upstream and downstream; Figure 5c). When TEs  
316 were grouped both by family and the family of the virus from which its closest  
317 EVE was derived from, stark differences in Kimura score distribution emerge  
318 (Figure 5c, Figure 5-Figure Supplement 1). Pao Bel elements near EVEs  
319 originating from Chuviridae and Flaviviridae had much higher Kimura divergence  
320 scores than Ty3/gypsy elements matching the same criteria. If Kimura  
321 divergence score is taken as a proxy for ‘genomic age’, these Pao Bel elements  
322 (and potentially the EVEs they are most closely associated with) are a more  
323 ancient acquisition than their Ty3/gypsy counterparts. On the other hand, both  
324 Pao Bel and Ty3/gypsy elements closest to EVEs derived from Rhabdoviridae  
325 show a more uniform distribution of scores, suggesting there may have been  
326 continued periods of Rhabdoviral infection (and subsequent EVE acquisition by  
327 transposable elements) in *Ae. aegypti*.

328

329 Recent publications have highlighted the integration of genetic material  
330 from non-retroviral RNA viruses into the genome of the host during infection that  
331 relies upon endogenous retro-transcriptase activity from transposons. A subset of  
332 EVEs found in mammalian systems seem to be under purifying selection, which  
333 suggests that they are beneficial to the host (Horie et al., 2010). A species’  
334 “EVEome” could represent a built-in, yet adaptable, viral defense system. All  
335 mosquito species share the same basic RNAi-based immune system. We  
336 propose differences in a given specie’s (or subpopulation’s) “EVEome”, such as  
337 those between *Ae. aegypti* and *Ae. albopictus* (Figure 5a), may represent an  
338 important factor contributing to inherent differences in vector competence. In  
339 support of this hypothesis, the *Ae. albopictus* assembly contains an EVE that  
340 clusters phylogenetically with extant DENV (Figure 5a) and has been shown to

341 be less competent at disseminating DENV in some cases (W. J. Chen, Wei, Hsu,  
342 & Chen, 1993; Whitehorn et al., 2015).

343

344

## 345 **Discussion**

346 *In vivo* studies of mosquito immunity are a valuable, but challenging  
347 approach to understanding arboviral life cycles. The *Ae. aegypti*-based cell line  
348 Aag2 provides a tool with which molecular characterization of the arboviral  
349 replication in mosquitos can be accomplished on a much wider scale. An  
350 improved, fully assembled *Ae. aegypti*-derived Aag2 genome is a significant step  
351 in best utilizing this cell line and furthering our understanding of *Ae. aegypti*  
352 biology.

353

354 The presence of piRNA producing EVEs in the *Ae. aegypti* genome is  
355 reminiscent of the CRISPR system in bacteria. Both take advantage of the  
356 invading pathogen's genetic material to create small RNAs capable of restricting  
357 an invading virus' replication. Furthermore, both end up integrated into the host's  
358 genome, likely providing some level of protection against future infections. EVEs  
359 themselves can present a unique opportunity to track viral evolution and  
360 historical interactions between host and virus (Holmes, 2011; Katzourakis,  
361 Tristem, Pybus, & Gifford, 2007; Keckesova, Ylinen, Towers, Gifford, &  
362 Katzourakis, 2009). Our Aag2 genome assembly refines our understanding of  
363 EVEs in the *Ae. aegypti* genome, and the breadth of coverage by which they may  
364 protect hosts against viral infections.

365

366 The finding that LTR retrotransposon elements (specifically Ty3/gypsy and  
367 Pao Bel) are closest in proximity to EVEs is intriguing. A number of (non-mutually  
368 exclusive) possibilities could explain this observation. It may be that Ty3/gypsy  
369 and Pao Bel elements were in the 'right place at the right time' to participate in  
370 acquisition of viral sequences as EVEs. LTR retrotransposon replication and  
371 virus replication must have overlapped both physically within the cell and

372 temporally within the natural history of *Ae. aegypti* evolution so as to provide the  
373 opportunity for LTR-mediated EVE integration. Template switching during  
374 reverse transcription has previously been proposed to play a role in creating the  
375 transposon-virus hybrids which integrate into the host genome to form EVEs  
376 (Cotton, et al., 2016; Geuking, et al., 2009). The enrichment of Pao Bel TEs near  
377 Chuviridae-derived sequences and Ty3/gypsy TEs near Flaviviridae and  
378 Rhabdoviridae sequences (Figure 4b) could have occurred by chance, or may  
379 hint at an even deeper level of specificity directing capture of viral sequences by  
380 LTRs. Possibly these TE/EVE pairs have increased sequence homology leading  
381 to more frequent template switching of the reverse transcriptase (Delviks-  
382 Frankenberg et al., 2011), or their subcellular localization of replication better  
383 coincide. One key distinction between LTR and non-LTR retrotransposons is the  
384 cellular location in which reverse transcription (RT) occurs. LTR  
385 retrotransposons undergo reverse transcription in the cytoplasm, while non-LTR  
386 retrotransposons undergo RT within the nucleus (Servant & Deininger, 2015).  
387 Given most RNA viruses also replicate within the cytoplasm, the opportunity for  
388 template switching onto an RNA virus genome would be more readily available to  
389 an LTR retrotransposon.

390

391 It is also possible that only LTR/EVE pairs were selected for after  
392 integrating into the mosquito genome. The role of selection on the organization  
393 and placement of EVEs in the *Ae. aegypti* genome is an intriguing one, and many  
394 EVEs have integrated into piRNA clusters from which *bona fide* piRNAs are  
395 produced (Figure 3a,b). However, a lack of synteny between EVEs in *Ae.*  
396 *aegypti* and *Ae. albopictus* suggests their acquisition likely took place post-  
397 speciation. Given this, along with LTRs being most active most recently (among  
398 TEs) in the Aag2 cell line (Figure 2f) (Maringer, et al., 2017), many EVEs in the  
399 *Aedes aegypti* genome likely represent relatively recent acquisitions. While an  
400 informative observation, this also limits the ability to date these EVEs with  
401 molecular-clock based techniques, and thus properly study selection. However,



402 the evidence so far suggests that some EVE sequences (and their organization  
403 in the genome) are being maintained evolutionarily.

404

405 As mentioned above, only the *Ae. albopictus* genome contains EVEs  
406 which cluster with extant DENV, and it also happens to be a less suitable vector  
407 for the virus (as compared to *Ae. aegypti*). We hypothesize these particular EVE  
408 insertions may provide a buffer against DENV infection. *Ae. albopictus* is still  
409 susceptible to DENV infection, thus the DENV-derived EVE does not provide  
410 complete protection against DENV infection. However, as piRNAs are found at  
411 various levels within different tissues of the mosquito (Akbari et al., 2013), EVE-  
412 derived piRNAs likely confer differing levels of viral resistance depending on the  
413 tissue in question. Thus, EVE-derived piRNAs could play a role in keeping viral  
414 infections in check at an organismal level, maybe indefinitely in the case of  
415 persistent infections. The hypothesis that many EVE-derived piRNAs in *Ae.*  
416 *aegypti* are functional (and their organization in the genome has been preserved)  
417 is further supported by the shared orientation of LTR retrotransposons and their  
418 nearby EVEs. In this arrangement, precursor transcripts originating from  
419 EVE/TE-containing piRNA clusters encode anti-viral piRNA sequence with the  
420 same directionality they contain anti-TE piRNA sequence. The resulting anti-  
421 sense piRNAs can then go on to silence their complementary (viral or TE) RNA.

422

423 A solid foundation with which to study the genetic factors contributing to  
424 vector competence is of utmost importance. With this in mind, we generated a  
425 highly contiguous assembly of the *Aedes aegypti* cell line, Aag2. With this long-  
426 read assembly, we then identified nearly the entire set of endogenous viral  
427 elements and their surrounding genomic context in the Aag2 cell line at a  
428 genome-wide scale. Uncovering the genomic context of this EVE-derived piRNA  
429 system in mosquitos provides the foundation for future studies on the role of  
430 EVEs in vector competence. The potential to manipulate a heritable, anti-viral  
431 system opens up new avenues to understand the complexities of the insect  
432 immune system and work to prevent spread of viral disease dependent on such



433 insect vectors.

434

435 **Acknowledgements**

436 We thank Dr. Kevin M. Dalton for helpful discussion and code for the analysis.

437

## 438 **MATERIALS AND METHODS**

### 439 **Cells culture**

440 *Aedes aegypti* Aag2 (Lan & Fallon, 1990; Peleg, 1968) cells were cultured  
441 at 28 °C without CO<sub>2</sub> in Schneider's *Drosophila* medium (GIBCO-Invitrogen),  
442 supplemented with 10% heat-inactivated fetal bovine serum (FBS), 1X non-  
443 essential amino acids (NEAA, UCSF Cell Culture Facility, 100X stock is 0.1 μM  
444 filtered, 10 mM each of Glycine, L-Alanine, L-Asparagine, L-Aspartic acid, L-  
445 Glutamic Acid, L-Proline, and L-Serine in de-ionized water), and 1X Penicillin-  
446 Streptomycin-Glutamine (Pen/Strep/G, 100X = 10,000 units of penicillin, 10,000  
447 μg of streptomycin, and 29.2 mg/ml of L-glutamine, Gibco).

448

### 449 **DNA sequencing**

450 Aag2 cells were grown in T-150 Flasks until ~80% confluent. Cells were  
451 then washed with dPBS twice and scrapped off in dPBS + 10 μg/ml RNase A  
452 (ThermoFisher). Genomic DNA (gDNA) was extracted from ~10<sup>8</sup> Aag2 cells  
453 using the QIAamp DNA Mini Kit according to the manufacturer's instructions with  
454 the optional RNase A treatment. Aag2 gDNA was re-suspended in 10mM Tris  
455 pH8, and the quality and quantity of the sample was assessed using the Agilent  
456 DNA12000 kit and 2100 Bioanalyzer system (Agilent Technologies), as well as  
457 the Qubit dsDNA Broad Range assay kit and Qubit Fluorometer (Thermo Fisher)  
458 and visualized by gel electrophoresis (1% TBE gel). After purification and  
459 quality control, a total of 130 ug of DNA was available for library preparation and  
460 sequencing.

461 SMRTbell libraries were prepared using Pacific Biosciences' Template  
462 Prep Kit 1.0 (PacBio) and a slightly modified version of the Pacific Biosciences'  
463 protocol, "Procedure & Checklist - 20-kb Template Preparation Using BluePippin  
464 Size-Selection System (15-kb Size Cutoff)". Specifically, 52.5ug of gDNA were  
465 hydrodynamically sheared to target sizes of 30kb (26 μg) and 35 kb (26 μg) using  
466 the Megaruptor® (Diagenode) with long hydropores according to the  
467 manufacturer's protocols. Size distributions of the final sheared gDNA were  
468 verified by pulse field electrophoresis of a 100ng sub-aliquot through 0.75%

469 agarose using the Pippin Pulse (Sage Science), run according to the  
470 manufacturer's "10-48 kb protocol" for 16 hrs. The two sheared samples were  
471 then pooled, for a total of 37ug sheared DNA to be used as input into SMRTbell  
472 preparation. Sheared DNA was subjected to DNA damage repair and ligated to  
473 SMRTbell adapters. Following ligation, extraneous DNA was digested with exo-  
474 nucleases and the resulting SMRTbell library was cleaned and concentrated with  
475 AMPure PB beads (Pacific Biosciences). A total of 20.5ug of library was available  
476 for size selection.

477         Approximately half (10ug) of the SMRTbell pooled SMRTbell library was  
478 size-selected using the BluePippin System (Sage Science) using a 15 kb cutoff  
479 and 0.75% agarose cassettes. To obtain longer read lengths, an additional 5ug  
480 of the library was selected using a 17kb cutoff.

481         Library quality and quantity were assessed using the Agilent 12000 DNA  
482 Kit and 2100 Bioanalyzer System (Agilent Technologies), as well as the Qubit  
483 dsDNA Broad Range Assay kit and Qubit Fluorometer (Thermo Fisher). An  
484 additional DNA Damage Repair step and AMPure bead cleanup were included  
485 after size-selection of the libraries.

486         Annealed libraries were then bound to DNA polymerases using 3nM of the  
487 SMRTbell library and 3X excess DNA polymerase at a concentration of 9nM  
488 using Pacific Biosciences DNA/Polymerase Binding Kit 1.0, (Pacific Biosciences).  
489 Bound libraries were sequenced on the Pacific Biosciences RSII using P6/C4  
490 chemistry (PacBio), magnetic bead loading (PacBio) and 6 hour collection times.  
491 84 SMRTcells of the > 15 kb library were loaded at concentrations of 75-100 pM  
492 on-plate. 32 SMRTcells of the > 17 kb library was prepared separately and  
493 loaded at on-plate concentrations of 40 pM and 60 pM. These 116 SMRTcells  
494 generated 92.7 GB of sequencing data, which resulted in approximately 76X  
495 coverage of the Aag2 genome. Average raw read length of 15.5KB, with average  
496 sub-reads length of 13.2kb. Assembly was performed using Quiver/FALCON

497

498 **Genome assembly statistics**

499 Basic statistics (e.g. Size, Gaps, N50, L50, # contigs) for each genome  
500 analyzed was produced using Quast (Gurevich, Saveliev, Vyahhi, & Tesler,  
501 2013).

502 As a complementary approach Benchmarking sets of Universal Single-  
503 Copy Orthologs (BUSCO) was also run using the Arthropod dataset in order to  
504 assess the completeness of genome assembly. Of the 2675 BUSCO groups  
505 searched only 81 were missing from the Aag2 assembly, indicating good  
506 assembly completeness. Of the 2315 BUSCOs found only 279 of them were  
507 annotated as fragmented, emphasizing the continuity of the assembly.

508

### 509 **Repeat Identification and Kimura Divergence**

510 In order to *de novo* identify and classify novel repetitive elements from the  
511 Aag2 genome, RepeatModeler was run on the assembled genome using  
512 standard parameters. Outputs from RepeatModeler were cross-referenced with  
513 annotated entries for *Aedes aegypti* from TEfam. All entries from RepeatModeler  
514 that were >80% identical to TEfam entries were discarded as redundant. This  
515 combined annotated and *de novo* identified list of repeat elements was used to  
516 identify the genome wide occurrences of repeats using RepeatMasker using  
517 standard parameters.

518 Kimura scores and corresponding alignment information were extracted  
519 from the “.align” file as output by RepeatMasker. This information was used to  
520 make the stacked plot in figure 2 using R (version 3.30) and the ggplot2 package.

521 Information from the header lines was then used to match Kimura  
522 divergence score with the appropriate EVE-proximal TEs based on contig, TE  
523 name, start point, and end point. TEs whose coordinates did not exactly match  
524 output of the align file were not used in the Kimura analysis. The violin plot of  
525 Kimura divergence scores was plotted using R (version 3.3.0) and the ggplot2  
526 plugin.

527

528 Citations:

529 Smit, AFA, Hubley, R. *RepeatModeler Open-1.0*.

530 2008-2015 <<http://www.repeatmasker.org>>

531 Smit, AFA, Hubley, R & Green, P. *RepeatMasker Open-4.0*.

532 2013-2015 <<http://www.repeatmasker.org>>.

533 Dr. Zhijian Jake Tu. TEfam. <<http://tefam.biochem.vt.edu/tefam/index.php>>

534

### 535 **EVE identification**

536 Identification of EVEs was achieved using standalone Blast+ (Altschul,  
537 Gish, Miller, Myers, & Lipman, 1990). Blast Searches were run using the Blastx  
538 command specifying the genome as the query and a refseq library composed of  
539 the ssRNA and dsRNA viral protein-coding sequences from the NCBI genomes  
540 as the database. The E-value threshold was set at 10<sup>-6</sup>.

541 The EVE with the lower E-value was chosen for further analysis to predict  
542 EVEs that overlapped. Several Blast hits to viral protein genes were identified as  
543 artifacts because of their homology to eukaryotic genes (e.g. closteroviruses  
544 encode an Hsp70 homologue). These artifacts were filtered by hand.

545

### 546 **Identification of LTR enrichment near EVEs**

547 Separate BED files containing all TEs in the Aag2 assembly and all EVEs  
548 in the Aag2 assembly were used as input to Bedtools (*bedtools closest* command  
549 using the *-io* flag, and *-id* or *-iu*) to find the single closest non-overlapping TE to  
550 each EVE (both upstream and downstream).

551 An in-house script compiled these two output files together and filtered  
552 them for the TE content of interest. TE categories (subclass, family, element)  
553 were assigned by RepeatMasker. Enrichment was compared to the prevalence  
554 of the TE element genome wide based on a one-sided binomial test. Stacked  
555 histograms were produced based on TE categories as found in Figure 3. The  
556 legend lists (up to) the 10 most prevalent TE elements of TE/EVE pairs in the  
557 same orientation. Plots were produced using Python (version 2.7.6) with the  
558 pandas and matplotlib plugins.

559

560 **Classification of nearest TE to EVEs by virus taxonomy**

561 Taxonomy categories for viruses from which each EVEs derived were  
562 assigned using an in-house script. Assignments were made based on NCBI's  
563 taxonomy database (<ftp://ftp.ncbi.nih.gov/pub/taxonomy/>), with the following  
564 additional annotations by hand.

565

566 *Virus species; assigned family:*

567 *Wuhan Mosquito Virus 8; Chuviridae*

568 *Wuchang Cockroach Virus 3; Chuviridae*

569 *Lishi Spider Virus 1; Chuviridae*

570 *Shayang Fly Virus 1; Chuviridae*

571 *Wenzhou Crab Virus 2; Chuviridae*

572

573 *Bole Tick Virus 2; Rhabdoviridae*

574 *Shayang Fly Virus 2; Rhabdoviridae*

575 *Wuhan Ant Virus; Rhabdoviridae*

576 *Wuhan Fly Virus 2; Rhabdoviridae*

577 *Wuhan House Fly Virus 1; Rhabdoviridae*

578 *Wuhan Mosquito Virus 9; Rhabdoviridae*

579 *Yongjia Tick Virus 2; Rhabdoviridae*

580

581 *Cilv-C; Virgaviridae*

582 *Citrus leprosis virus C; Virgaviridae*

583 *Blueberry necrotic ring blotch virus; Virgaviridae*

584

585 *Wutai Mosquito Virus; Bunyaviridae*

586

587 Heat maps were produced using the Seaborn plugin for python. Only TEs  
588 with  $\geq 10\%$  proportion in at least one sample (Flaviviridae, Chuviridae, or  
589 Rhabdoviridae) are shown. Color was assigned based on proportion of TE  
590 element/family in each viral category.

591           Enrichment was scored as above using a one-sided binomial test  
592 (significant is p-value < 0.0001).

593

#### 594 **Small RNA bioinformatics**

595           Adaptors were trimmed using Cutadapt  
596 (<http://dx.doi.org/10.14806/ej.17.1.200>) using the --discard-untrimmed and -m 19  
597 flags to discard reads without adaptors and below 19 nt in length. Reads were  
598 mapped using bowtie (Langmead, Trapnell, Pop, & Salzberg, 2009) using the -v  
599 1 flag. Read distance overlaps were generated by viROME (Watson, Schnettler,  
600 & Kohl, 2013). Sequence biases were determined by Weblogo (Crooks, Hon,  
601 Chandonia, & Brenner, 2004).

#### 602 **piCluster Analysis**

603           piClusters were identified using PROtrac (Rosenkranz & Zischler, 2012)  
604 based on mapping with positions for beta-eliminated small RNAs libraries from  
605 Aag2 cells from sRNAmapper.pl. Based on these predictions, visualizations of  
606 clusters were produced using EasyFig (Sullivan, Petty, & Beatson, 2011) for  
607 visualization of TEs and R for comparison of TEs, piRNA abundance and EVE  
608 positions.

#### 609 **Sequence alignment and phylogenetic analysis**

610           For phylogenetic analysis of Flaviviridae, polyprotein sequences from 61  
611 members of the Flaviviridae family were aligned with MUSCLE (Edgar, 2004) and  
612 a maximum likelihood tree was generated with FastTree (Price, Dehal, & Arkin,  
613 2009) using the generalised time reversible substitution model ("-gtr"). Trees  
614 were visualized and annotated with ggtree (DOI: 10.1111/2041-210X.12628).

615

#### 616 **EVE coverage**

617           Base R (version 3.3.0) was used to show regions individual EVEs span on  
618 the indicated viral family (and protein). EVE length is a function of the percentage  
619 of the respective ORF from which it derives.

620



621 **Statistics summary**

622           Enrichment for TE elements near EVEs (Figure 3B, 3F) was determined  
623 with a one-sided binomial test (alternative hypothesis 'greater'). Enrichment of  
624 EVEs in piClusters was determined by Fisher's Test. Difference in Kimura  
625 Divergence distributions (not necessarily normally distributed) of TEs near EVEs  
626 vs total EVE populations (Figure 4C) was determined by Kolmogorov-Smirnov  
627 tests.

628

629 **Code availability**

630           The code used to generate the datasets used for visualization have been  
631 provided.

632 **Data availability**

633           The Aag2 genome (v 1.00) is available through VectorBase  
634 (<https://www.vectorbase.org/organisms/aedes-aegypti/aag2/aag2>).

635 Main datasets produced during this work have been provided in excel format.

636

637 **REFERENCES**

638

639 Akbari, O. S., Antoshechkin, I., Amrhein, H., Williams, B., Diloreto, R., Sandler, J., &  
640 Hay, B. A. (2013). The developmental transcriptome of the mosquito *Aedes*  
641 *aegypti*, an invasive species and major arbovirus vector. *G3 (Bethesda)*, 3(9),  
642 1493-1509. doi: 10.1534/g3.113.006742

643 g3.113.006742 [pii]

644 Altschul, S. F., Gish, W., Miller, W., Myers, E. W., & Lipman, D. J. (1990). Basic local  
645 alignment search tool. *J Mol Biol*, 215(3), 403-410. doi: 10.1016/S0022-  
646 2836(05)80360-2

647 S0022-2836(05)80360-2 [pii]

648 Arensburger, P., Hice, R. H., Wright, J. A., Craig, N. L., & Atkinson, P. W. (2011). The  
649 mosquito *Aedes aegypti* has a large genome size and high transposable element  
650 load but contains a low proportion of transposon-specific piRNAs. *BMC*  
651 *Genomics*, 12, 606. doi: 10.1186/1471-2164-12-606

652 1471-2164-12-606 [pii]

653 Bennett, K. E., Olson, K. E., Munoz Mde, L., Fernandez-Salas, I., Farfan-Ale, J. A.,  
654 Higgs, S., . . . Beaty, B. J. (2002). Variation in vector competence for dengue 2  
655 virus among 24 collections of *Aedes aegypti* from Mexico and the United States.  
656 *Am J Trop Med Hyg*, 67(1), 85-92.

657 Bhatt, S., Gething, P. W., Brady, O. J., Messina, J. P., Farlow, A. W., Moyes, C. L., . . .  
658 Hay, S. I. (2013). The global distribution and burden of dengue. *Nature*,  
659 496(7446), 504-507. doi: 10.1038/nature12060

660 nature12060 [pii]

661 Chen, W. J., Wei, H. L., Hsu, E. L., & Chen, E. R. (1993). Vector competence of *Aedes*  
662 *albopictus* and *Ae. aegypti* (Diptera: Culicidae) to dengue 1 virus on Taiwan:  
663 development of the virus in orally and parenterally infected mosquitoes. *J Med*  
664 *Entomol*, 30(3), 524-530.

665 Chen, X. G., Jiang, X., Gu, J., Xu, M., Wu, Y., Deng, Y., . . . James, A. A. (2015).  
666 Genome sequence of the Asian Tiger mosquito, *Aedes albopictus*, reveals  
667 insights into its biology, genetics, and evolution. *Proc Natl Acad Sci U S A*,  
668 112(44), E5907-5915. doi: 10.1073/pnas.1516410112

669 1516410112 [pii]

670 Conzelmann, K. K. (1998). Nonsegmented negative-strand RNA viruses: genetics and  
671 manipulation of viral genomes. *Annu Rev Genet*, 32, 123-162. doi:  
672 10.1146/annurev.genet.32.1.123

673 Cotton, J. A., Steinbiss, S., Yokoi, T., Tsai, I. J., & Kikuchi, T. (2016). An expressed,  
674 endogenous Nodavirus-like element captured by a retrotransposon in the  
675 genome of the plant parasitic nematode *Bursaphelenchus xylophilus*. *Sci Rep*, 6,  
676 39749. doi: 10.1038/srep39749

677 srep39749 [pii]

678 Crooks, G. E., Hon, G., Chandonia, J. M., & Brenner, S. E. (2004). WebLogo: a  
679 sequence logo generator. *Genome Res*, 14(6), 1188-1190. doi:  
680 10.1101/gr.849004

681 14/6/1188 [pii]

682 de Vanssay, A., Bouge, A. L., Boivin, A., Hermant, C., Teyssset, L., Delmarre, V., . . .  
683 Ronsseray, S. (2012). Paramutation in *Drosophila* linked to emergence of a  
684 piRNA-producing locus. *Nature*, 490(7418), 112-115. doi: 10.1038/nature11416

685 nature11416 [pii]

- 686 Delviks-Frankenberry, K., Galli, A., Nikolaitchik, O., Mens, H., Pathak, V. K., & Hu, W. S.  
687 (2011). Mechanisms and factors that influence high frequency retroviral  
688 recombination. *Viruses*, 3(9), 1650-1680. doi: 10.3390/v3091650  
689 viruses-03-01650 [pii]
- 690 Dudchenko, O., Batra, S. S., Omer, A. D., Nyquist, S. K., Hoeger, M., Durand, N. C., . . .  
691 Aiden, E. L. (2017). De novo assembly of the *Aedes aegypti* genome using Hi-C  
692 yields chromosome-length scaffolds. *Science*. doi: eaal3327 [pii]  
693 10.1126/science.aal3327  
694 science.aal3327 [pii]
- 695 Edgar, R. C. (2004). MUSCLE: multiple sequence alignment with high accuracy and high  
696 throughput. *Nucleic Acids Res*, 32(5), 1792-1797. doi: 10.1093/nar/gkh340  
697 32/5/1792 [pii]
- 698 Feschotte, C., & Gilbert, C. (2012). Endogenous viruses: insights into viral evolution and  
699 impact on host biology. *Nat Rev Genet*, 13(4), 283-296. doi: 10.1038/nrg3199  
700 nrg3199 [pii]
- 701 Geuking, M. B., Weber, J., Dewannieux, M., Gorelik, E., Heidmann, T., Hengartner, H., .  
702 . . Hangartner, L. (2009). Recombination of retrotransposon and exogenous RNA  
703 virus results in nonretroviral cDNA integration. *Science*, 323(5912), 393-396. doi:  
704 10.1126/science.1167375  
705 323/5912/393 [pii]
- 706 Gifford, W. D., Pfaff, S. L., & Macfarlan, T. S. (2013). Transposable elements as genetic  
707 regulatory substrates in early development. *Trends Cell Biol*, 23(5), 218-226. doi:  
708 10.1016/j.tcb.2013.01.001  
709 S0962-8924(13)00003-2 [pii]
- 710 Goic, B., Stapleford, K. A., Frangeul, L., Doucet, A. J., Gausson, V., Blanc, H., . . .  
711 Saleh, M. C. (2016). Virus-derived DNA drives mosquito vector tolerance to  
712 arboviral infection. *Nat Commun*, 7, 12410. doi: 10.1038/ncomms12410  
713 ncomms12410 [pii]
- 714 Goic, B., Vodovar, N., Mondotte, J. A., Monot, C., Frangeul, L., Blanc, H., . . . Saleh, M.  
715 C. (2013). RNA-mediated interference and reverse transcription control the  
716 persistence of RNA viruses in the insect model *Drosophila*. *Nat Immunol*, 14(4),  
717 396-403. doi: 10.1038/ni.2542  
718 ni.2542 [pii]
- 719 Gurevich, A., Saveliev, V., Vyahhi, N., & Tesler, G. (2013). QUASt: quality assessment  
720 tool for genome assemblies. *Bioinformatics*, 29(8), 1072-1075. doi:  
721 10.1093/bioinformatics/btt086  
722 btt086 [pii]
- 723 Holmes, E. C. (2011). The evolution of endogenous viral elements. *Cell Host Microbe*,  
724 10(4), 368-377. doi: 10.1016/j.chom.2011.09.002  
725 S1931-3128(11)00285-X [pii]
- 726 Honda, T., & Tomonaga, K. (2016). Endogenous non-retroviral RNA virus elements  
727 evidence a novel type of antiviral immunity. *Mob Genet Elements*, 6(3),  
728 e1165785. doi: 10.1080/2159256X.2016.1165785  
729 1165785 [pii]
- 730 Horie, M., Honda, T., Suzuki, Y., Kobayashi, Y., Daito, T., Oshida, T., . . . Tomonaga, K.  
731 (2010). Endogenous non-retroviral RNA virus elements in mammalian genomes.  
732 *Nature*, 463(7277), 84-87. doi: 10.1038/nature08695  
733 nature08695 [pii]
- 734 Katzourakis, A., & Gifford, R. J. (2010). Endogenous viral elements in animal genomes.  
735 *PLoS Genet*, 6(11), e1001191. doi: 10.1371/journal.pgen.1001191

- 736 Katzourakis, A., Tristem, M., Pybus, O. G., & Gifford, R. J. (2007). Discovery and  
737 analysis of the first endogenous lentivirus. *Proc Natl Acad Sci U S A*, *104*(15),  
738 6261-6265. doi: 0700471104 [pii]  
739 10.1073/pnas.0700471104
- 740 Keckesova, Z., Ylinen, L. M., Towers, G. J., Gifford, R. J., & Katzourakis, A. (2009).  
741 Identification of a RELIK orthologue in the European hare (*Lepus europaeus*)  
742 reveals a minimum age of 12 million years for the lagomorph lentiviruses.  
743 *Virology*, *384*(1), 7-11. doi: 10.1016/j.virol.2008.10.045  
744 S0042-6822(08)00718-6 [pii]
- 745 Kimura, M. (1980). A simple method for estimating evolutionary rates of base  
746 substitutions through comparative studies of nucleotide sequences. *J Mol Evol*,  
747 *16*(2), 111-120.
- 748 Kraemer, M. U., Sinka, M. E., Duda, K. A., Mylne, A. Q., Shearer, F. M., Barker, C. M., . . .  
749 . Hay, S. I. (2015). The global distribution of the arbovirus vectors *Aedes aegypti*  
750 and *Ae. albopictus*. *Elife*, *4*, e08347. doi: 10.7554/eLife.08347
- 751 Kramer, L. D. (2016). Complexity of virus-vector interactions. *Curr Opin Virol*, *21*, 81-86.  
752 doi: S1879-6257(16)30104-3 [pii]  
753 10.1016/j.coviro.2016.08.008
- 754 Kramer, L. D., & Ciota, A. T. (2015). Dissecting vectorial capacity for mosquito-borne  
755 viruses. *Curr Opin Virol*, *15*, 112-118. doi: 10.1016/j.coviro.2015.10.003  
756 S1879-6257(15)00153-4 [pii]
- 757 Lan, Q., & Fallon, A. M. (1990). Small heat shock proteins distinguish between two  
758 mosquito species and confirm identity of their cell lines. *Am J Trop Med Hyg*,  
759 *43*(6), 669-676.
- 760 Langmead, B., Trapnell, C., Pop, M., & Salzberg, S. L. (2009). Ultrafast and memory-  
761 efficient alignment of short DNA sequences to the human genome. *Genome Biol*,  
762 *10*(3), R25. doi: 10.1186/gb-2009-10-3-r25  
763 gb-2009-10-3-r25 [pii]
- 764 Lee, A., Nolan, A., Watson, J., & Tristem, M. (2013). Identification of an ancient  
765 endogenous retrovirus, predating the divergence of the placental mammals.  
766 *Philos Trans R Soc Lond B Biol Sci*, *368*(1626), 20120503. doi:  
767 10.1098/rstb.2012.0503  
768 rstb.2012.0503 [pii]
- 769 Lesbats, P., Engelman, A. N., & Cherepanov, P. (2016). Retroviral DNA Integration.  
770 *Chem Rev*, *116*(20), 12730-12757. doi: 10.1021/acs.chemrev.6b00125
- 771 Li, C. X., Shi, M., Tian, J. H., Lin, X. D., Kang, Y. J., Chen, L. J., . . . Zhang, Y. Z. (2015).  
772 Unprecedented genomic diversity of RNA viruses in arthropods reveals the  
773 ancestry of negative-sense RNA viruses. *Elife*, *4*. doi: 10.7554/eLife.05378
- 774 Maringer, K., Yousuf, A., Heesom, K. J., Fan, J., Lee, D., Fernandez-Sesma, A., . . .  
775 Davidson, A. D. (2017). Proteomics informed by transcriptomics for  
776 characterising active transposable elements and genome annotation in *Aedes*  
777 *aegypti*. *BMC Genomics*, *18*(1), 101. doi: 10.1186/s12864-016-3432-5  
778 10.1186/s12864-016-3432-5 [pii]
- 779 Miesen, P., Girardi, E., & van Rij, R. P. (2015). Distinct sets of PIWI proteins produce  
780 arbovirus and transposon-derived piRNAs in *Aedes aegypti* mosquito cells.  
781 *Nucleic Acids Res*, *43*(13), 6545-6556. doi: 10.1093/nar/gkv590  
782 gkv590 [pii]
- 783 Miesen, P., Ivens, A., Buck, A. H., & van Rij, R. P. (2016). Small RNA Profiling in  
784 Dengue Virus 2-Infected *Aedes* Mosquito Cells Reveals Viral piRNAs and Novel  
785 Host miRNAs. *PLoS Negl Trop Dis*, *10*(2), e0004452. doi:  
786 10.1371/journal.pntd.0004452

- 787 PNTD-D-15-01748 [pii]  
788 Miesen, P., Joosten, J., & van Rij, R. P. (2016). PIWIs Go Viral: Arbovirus-Derived  
789 piRNAs in Vector Mosquitoes. *PLoS Pathog*, 12(12), e1006017. doi:  
790 10.1371/journal.ppat.1006017  
791 PPATHOGENS-D-16-02114 [pii]  
792 Mongelli, V., & Saleh, M. C. (2016). Bugs Are Not to Be Silenced: Small RNA Pathways  
793 and Antiviral Responses in Insects. *Annu Rev Virol*, 3(1), 573-589. doi:  
794 10.1146/annurev-virology-110615-042447  
795 Nene, V., Wortman, J. R., Lawson, D., Haas, B., Kodira, C., Tu, Z. J., . . . Severson, D.  
796 W. (2007). Genome sequence of *Aedes aegypti*, a major arbovirus vector.  
797 *Science*, 316(5832), 1718-1723. doi: 1138878 [pii]  
798 10.1126/science.1138878  
799 Parrish, N. F., Fujino, K., Shiromoto, Y., Iwasaki, Y. W., Ha, H., Xing, J., . . . Tomonaga,  
800 K. (2015). piRNAs derived from ancient viral processed pseudogenes as  
801 transgenerational sequence-specific immune memory in mammals. *RNA*, 21(10),  
802 1691-1703. doi: 10.1261/rna.052092.115  
803 rna.052092.115 [pii]  
804 Peleg, J. (1968). Growth of arboviruses in monolayers from subcultured mosquito  
805 embryo cells. *Virology*, 35(4), 617-619.  
806 Price, M. N., Dehal, P. S., & Arkin, A. P. (2009). FastTree: computing large minimum  
807 evolution trees with profiles instead of a distance matrix. *Mol Biol Evol*, 26(7),  
808 1641-1650. doi: 10.1093/molbev/msp077  
809 msp077 [pii]  
810 Rosenkranz, D., Rudloff, S., Bastuck, K., Ketting, R. F., & Zischler, H. (2015). Tupaia  
811 small RNAs provide insights into function and evolution of RNAi-based  
812 transposon defense in mammals. *RNA*, 21(5), 911-922. doi:  
813 10.1261/rna.048603.114  
814 rna.048603.114 [pii]  
815 Rosenkranz, D., & Zischler, H. (2012). proTRAC--a software for probabilistic piRNA  
816 cluster detection, visualization and analysis. *BMC Bioinformatics*, 13, 5. doi:  
817 10.1186/1471-2105-13-5  
818 1471-2105-13-5 [pii]  
819 Servant, G., & Deininger, P. L. (2015). Insertion of Retrotransposons at Chromosome  
820 Ends: Adaptive Response to Chromosome Maintenance. *Front Genet*, 6, 358.  
821 doi: 10.3389/fgene.2015.00358  
822 Staginnus, C., Gregor, W., Mette, M. F., Teo, C. H., Borroto-Fernandez, E. G., Machado,  
823 M. L., . . . Schwarzacher, T. (2007). Endogenous pararetroviral sequences in  
824 tomato (*Solanum lycopersicum*) and related species. *BMC Plant Biol*, 7, 24. doi:  
825 1471-2229-7-24 [pii]  
826 10.1186/1471-2229-7-24  
827 Sullivan, M. J., Petty, N. K., & Beatson, S. A. (2011). Easyfig: a genome comparison  
828 visualizer. *Bioinformatics*, 27(7), 1009-1010. doi: 10.1093/bioinformatics/btr039  
829 btr039 [pii]  
830 Thompson, P. J., Macfarlan, T. S., & Lorincz, M. C. (2016). Long Terminal Repeats:  
831 From Parasitic Elements to Building Blocks of the Transcriptional Regulatory  
832 Repertoire. *Mol Cell*, 62(5), 766-776. doi: 10.1016/j.molcel.2016.03.029  
833 S1097-2765(16)30012-0 [pii]  
834 Vicoso, B., & Bachtrog, D. (2015). Numerous transitions of sex chromosomes in Diptera.  
835 *PLoS Biol*, 13(4), e1002078. doi: 10.1371/journal.pbio.1002078  
836 PBIOLGY-D-14-02861 [pii]

837 Watson, M., Schnettler, E., & Kohl, A. (2013). viRome: an R package for the  
838 visualization and analysis of viral small RNA sequence datasets. *Bioinformatics*,  
839 29(15), 1902-1903. doi: 10.1093/bioinformatics/btt297  
840 btt297 [pii]  
841 Whitehorn, J., Kien, D. T., Nguyen, N. M., Nguyen, H. L., Kyrylos, P. P., Carrington, L.  
842 B., . . . Simmons, C. P. (2015). Comparative Susceptibility of *Aedes albopictus*  
843 and *Aedes aegypti* to Dengue Virus Infection After Feeding on Blood of Viremic  
844 Humans: Implications for Public Health. *J Infect Dis*, 212(8), 1182-1190. doi:  
845 10.1093/infdis/jiv173  
846 jiv173 [pii]  
847 Yamanaka, S., Siomi, M. C., & Siomi, H. (2014). piRNA clusters and open chromatin  
848 structure. *Mob DNA*, 5, 22. doi: 10.1186/1759-8753-5-22  
849 1759-8753-5-22 [pii]  
850  
851  
852



## 853 LEGENDS FOR MAIN FIGURES

854

855 **Figure 1. Contiguity of the *Aedes aegypti* genome is drastically improved in**  
856 **the Aag2 assembly.** (A) Histogram of contig length vs. total amount of sequence  
857 contained in each bin. The Aag2 assembly achieved the largest contig sizes (by  
858 an order of magnitude) compared to previous *Aedes aegypti*-derived assemblies.  
859 This large contig size also resulted in more overall sequence information/number  
860 of bases. (B) Boxplots indicating number of contigs aligned between LVP  
861 (Sanger) and Aag2 (PacBio). When aligned to each other, more contigs from  
862 LVP are aligned to larger Aag2 contigs than vice versa. (C) Dot plot alignment of  
863 multiple contigs from LVP (each denoted by a different color) to a single contig  
864 from Aag2 (sequenced by Pac Bio). Expanded repeats in the Aag2 assembly  
865 can be seen where the same LVP contig aligns to multiple Aag2 locations. In  
866 some instances, portions of multiple LVP contigs align to a single locus within the  
867 Aag2 contig (vertical 'spikes' of alignment). (D) More detailed dot plot alignments  
868 between Aag2 and LVP assemblies. Regions in the LVP assembly are expanded  
869 within the Aag2 assembly at numerous loci. Regions corresponding to putative  
870 piClusters in the Aag2 assembly are highlighted with grey shaded boxes. Each  
871 panel is labeled with the contig and position of the predicted piCluster shown.

872

873 **Figure 2. The repeat landscape of the *Aedes aegypti* genome is**  
874 **predominantly made up of transposable elements.** (A) Circular plot of the  
875 Aag2 assembly, showing the 10 largest contigs (black rectangles; ordered by  
876 size) and transposable elements (circles; colored by TE class). Transposable  
877 elements are prevalent throughout the contigs (and the entire *aegypti* genome).  
878 Rectangles representing contigs are staggered to indicate relative contig size. (B)  
879 Density plot showing the distribution of TE content for contigs in the assembly.  
880 Red line indicates the genome-wide TE content. (C) Density plot comparing TE  
881 counts binned by TEs per contig between the Aag2, LVP(Sanger), and UCB  
882 (Illumina) assemblies. The Aag2 assembly has significantly more TEs per single  
883 contig than previous assemblies. (D) Pie chart representing TE class  
884 representation in the Aag2 genome. Further detail can be found in Table 2. (E)  
885 Stacked area plot showing the relative density of TEs along an example contig.  
886 Local proportions are based on a window size of 25 kbps. (F) Stacked histogram  
887 of Kimura divergence for classes of TEs found in the Aag2 assembly, expressed  
888 as a function of percentage of the genome. A relatively recent expansion/active  
889 phase of LTRs is evident (increase in LTRs at low Kimura divergence scores).  
890 Kimura divergence scores are based on the accumulated mutations of a given  
891 TE sequence compared to a consensus.

892

893 **Figure 3. Endogenous Viral Elements (EVEs) are found throughout the**  
894 **Aag2 genome and are observed in piClusters.** (A) Circular plot showing  
895 piRNAs mapping to the Aag2 genome, with those derived from EVEs highlighted  
896 in red. Inner tracks show EVEs found in the Aag2 genome, colored by virus  
897 family from which they derived. (B) i) Density plot of TEs along Aag2 contig  
898 000015F. Local enrichment for particular TE classes can be seen. ii) Zoom of



899 indicated region in i). Transposons are indicated by colored arrows, categorized  
900 by TE class. '+' and '-' indicate strandedness of the transposons. EVEs are  
901 shown as black triangles, organized by strandedness. piRNAs mapping to the  
902 region are indicated at the bottom, in either sense or anti-sense direction. Clear  
903 clusters of EVEs and TEs can be seen, with piRNAs specifically mapping to  
904 these clusters. The further zoom (iii) better shows the shared directionality of  
905 EVEs (colored triangles) and their surrounding transposon sequences (black,  
906 semi-transparent triangles). (C) Bar plot showing counts of EVEs derived from  
907 different viral families. (D) Bar plot showing a larger number of piRNA reads can  
908 be successfully mapped to the Aag2 (PacBio) assembly compared to the LVP  
909 (Sanger) assembly.

910

911 **Figure 4. EVEs are primarily associated with LTR transposable elements.**

912 (A) Histograms showing counts of non-overlapping TEs closest to EVEs binned  
913 by distance, both upstream (negative x-axis values) and downstream (positive x-  
914 axis values). Positive y-axis counts refer to TE/EVE 'pairs' with the same  
915 strandedness, while negative y-axis counts are EVEs where the closest TE has  
916 the opposite strandedness. The "+/-" value indicates the ratio of TE/EVE pairs  
917 with the same strandedness to those with the opposite strandedness. Total  
918 counts represented in each histogram: All classes (n=766); LTR only (n=475); No  
919 LTRs (n=291); Ty3/gypsy only (n=274); Pao Bel only (n=180); Ty1/copia only  
920 (n=21). (B) Heatmap showing categories of TEs nearest EVEs, categorized by  
921 the viral family from which the EVEs were derived. Only TEs with the same  
922 strandedness as its nearest EVE are shown. A "\*" indicates significant  
923 enrichment by one-sided binomial test against the background prevalence of a  
924 given TE category in the genome (eg among all LTRs nearest Chuviridae-derived  
925 EVEs, Pao Bel elements are specifically enriched compared to the genome-wide  
926 counts of Pao Bel among all LTRs). Color indicates proportion of a given TE  
927 category nearest EVEs derived from the indicated viral family. Grey indicates the  
928 element was not found to be the closest TE to any EVEs derived from the  
929 indicated viral family. Only TE elements which made up at least 10% of the  
930 dataset for a given viral family are shown. "Pao Bel elements" refers to  
931 Chuviridae, while "Ty3/gypsy elements" corresponds to Flaviviridae and  
932 Rhabdoviridae. Total sample size of all TEs analyzed for each dataset: AllTEs-  
933 Rhabdoviridae (n=223), Flaviviridae (n=118), Chuviridae (n=112); RNA-  
934 basedTEs- Rhabdoviridae (n=160), Flaviviridae (n=116), Chuviridae (n=95);  
935 LTRs- Rhabdoviridae (n=123), Flaviviridae (n=106), Chuviridae (n=84); Pao Bel-  
936 Chuviridae (n=67); Ty3/gypsy- Rhabdoviridae (n=99), Flaviviridae (n=77).

937

938 **Figure 5. EVEs found in the genomes of *Aedes aegypti* and *Aedes***

939 ***albopictus* are derived from overlapping families of viruses, but do not**  
940 **share the same sequences.** (A) Phylogenetic relationship between 61 members  
941 of Flaviviridae. EVEs present in (i) *Ae. aegypti* or (ii) *Ae. albopictus* which align to  
942 the indicated virus are marked with a colored circle. Size corresponds to  
943 abundance of EVEs derived from given species. (B) Coverage plots of EVEs  
944 derived from the viral families (i) Flaviviridae, (ii) Rhabdoviridae, and (iii)

945 Chuviridae. Each bar represents a single EVE, while its length and position  
946 denotes the region of the indicated ORF from which its sequence is derived.  
947 Length is expressed as a percentage of the total ORF, in order to normalize for  
948 varying ORF lengths among different members of a given viral family. In (i), the  
949 genome of CFAV is presented for reference. In (ii) and (iii), a generic genome is  
950 presented to better illustrate where EVEs are derived from within the genome as  
951 a whole (and within each specific ORF). (C) Violin plot of Kimura divergence  
952 scores for EVEs' nearest-neighbor TEs. Only EVEs whose nearest neighbor TE  
953 is non-overlapping and shares the same strandedness are shown. Both  
954 upstream and downstream nearest neighbors are represented. Counts in each  
955 category are as follows: Pao Bel-All (n=113,526); Pao Bel-Chuviridae (n=36);  
956 Pao Bel-Flaviviridae (n=12); Pao Bel-Rhabdoviridae (n=14); Ty3/gypsy -All  
957 (n=174,353); Ty3/gypsy -Chuviridae (n=10); Ty3/gypsy -Flaviviridae (n=43);  
958 Ty3/gypsy-Rhabdoviridae (n=53). Differences between indicated distributions  
959 were determined by Kolmogorov-Smirnov test. '\*': p-value <0.05; '\*\*': p-value  
960 <5e-4; '\*\*\*': p-value <5e-8.  
961  
962

963 **LEGENDS FOR SUPPLEMENTARY FIGURES**

964

965 **Figure 2-Figure Supplement 1. Transposons are distributed throughout the**  
966 **entire Aag2 genome.** (A) Similar plot to Figure 2A, but showing all contigs of the  
967 Aag2 assembly. Circular plot of the Aag2 assembly, with every contig (black  
968 rectangles; ordered by size) and transposable element (circles; colored by TE  
969 class). Transposable elements are prevalent throughout the entire *Ae. aegypti*  
970 genome. Rectangles representing contigs are staggered to indicate relative  
971 contig size.

972

973 **Figure 4-Figure Supplement 1. TEs which overlap EVEs are also**  
974 **overrepresented by LTR elements.** (A) Histograms of TEs which overlap EVEs,  
975 broken down by the indicated categories. The left bin represents TEs whose  
976 start is upstream, and end overlaps the EVE. The right bin indicates TEs whose  
977 end is downstream, and start overlaps an EVE. The middle bin indicates TEs  
978 whose coordinates surround an EVE. Positive count values indicate TE and  
979 EVEs with shared directionality, while negative values represent TE and EVEs  
980 with opposite directionality. Some EVEs showed multiple overlapping TEs, all of  
981 which are represented on the charts. (B) Heatmap, as in Figure 3, showing EVE-  
982 overlapping TE 'preference' for Rhabdoviridae, Flaviviridae, and Chuviridae-  
983 derived EVEs.

984

985 **Figure 3-Figure Supplement 1. EVEs are typically found within**  
986 **unidirectional piRNA clusters.** The left panels correspond to a region of Contig  
987 000933F encoding 4 tandem, unidirectional piRNA clusters (as identified by  
988 proTRAC), each containing EVEs. Each cluster expresses piRNAs primarily anti-  
989 sense to the TEs/EVEs which define them. Similarly, a single large piRNA  
990 cluster on Contig 000044F is shown in the right panels. The shared directionality  
991 between TEs and EVEs (Figure 3B) is evident. Again, piRNA expression is  
992 almost exclusively in the antisense direction with respect to the TEs/EVEs.

993

994 **Figure 2-Figure Supplement 2. Kimura divergence scores of LTRs only**  
995 **show expansion of Pao Bel and Ty3/gypsy elements.** Bar plot of kimura  
996 scores assigned to LTRs only, categorized by TE family and expressed as  
997 percent of total genome (as in Figure 2E). At very low (0-1) Kimura divergence  
998 scores, Ty3/gypsy and Pao Bel exhibit a marked increase in proportion of the  
999 genome.

1000

1001 **Figure 5-Figure Supplement 1. Kimura divergence of EVE proximal TEs is**  
1002 **distinct from TEs genome wide.** Density plots of kimura distributions of all Pao  
1003 Bel or Ty3/gypsy TEs and EVE-proximal TEs. EVE-proximal TEs are further  
1004 categorized by the viral family of the EVE it is nearest.

1005

1006

1007

|                           | UCB         | LVP           | Aag2           |
|---------------------------|-------------|---------------|----------------|
| Sample                    | LVP strain  | LVP strain    | Aag2 cell line |
| Seq. Strategy             | Illumina    | Sanger        | PacBio         |
| Released                  | 5/2015      | 6/2006        | NA             |
| Coverage                  | 6.8x        | 7.6x          | ~50x           |
| Total sequence length     | 744,596,036 | 1,383,957,531 | 1,723,930,323  |
| Total assembly gap length | 196,533,049 | 73,881,199    | 0              |
| Num. of contigs           | 961,292     | 36,204        | 3,752          |
| Contig N50                | 989         | 82,618        | 1,420,116      |
| Contig L50                | 151,087     | 4,346         | 368            |

|        | Num. of elements | Length (Mbp) | Percent of genome |
|--------|------------------|--------------|-------------------|
| SINE   | 28,301           | 4.4          | 0.25              |
| LINE   | 558,382          | 259.9        | 15.07             |
| LTR    | 495,204          | 163.9        | 9.51              |
| DNA    | 1,184,522        | 309.0        | 17.93             |
| Other* | 725,958          | 233.7        | 13.55             |
| Total  | 2,992,367        | 970.9        | 56.31             |

\*includes helitrons, MITEs, Penelope, RC, UD, and unknown elements

A

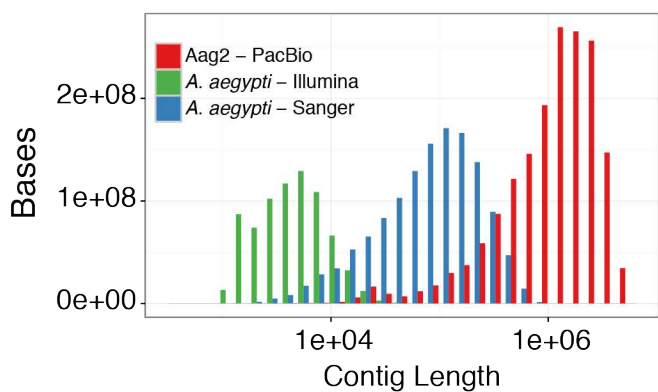

B

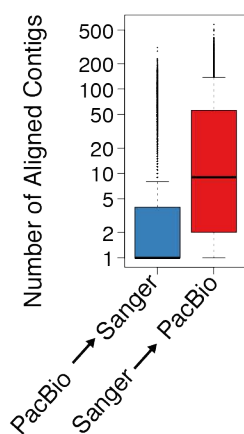

C

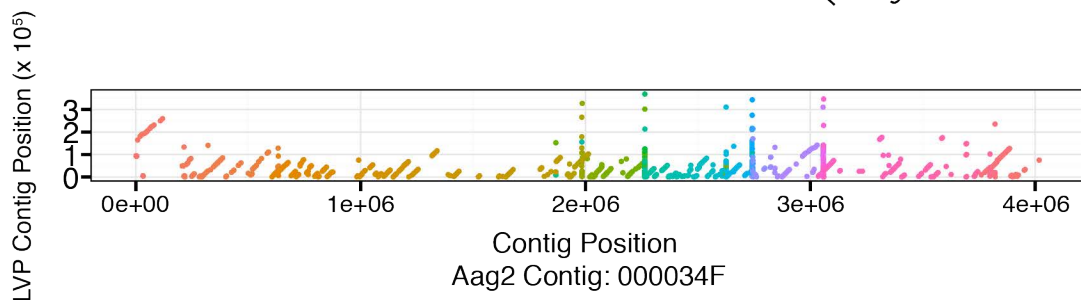

D

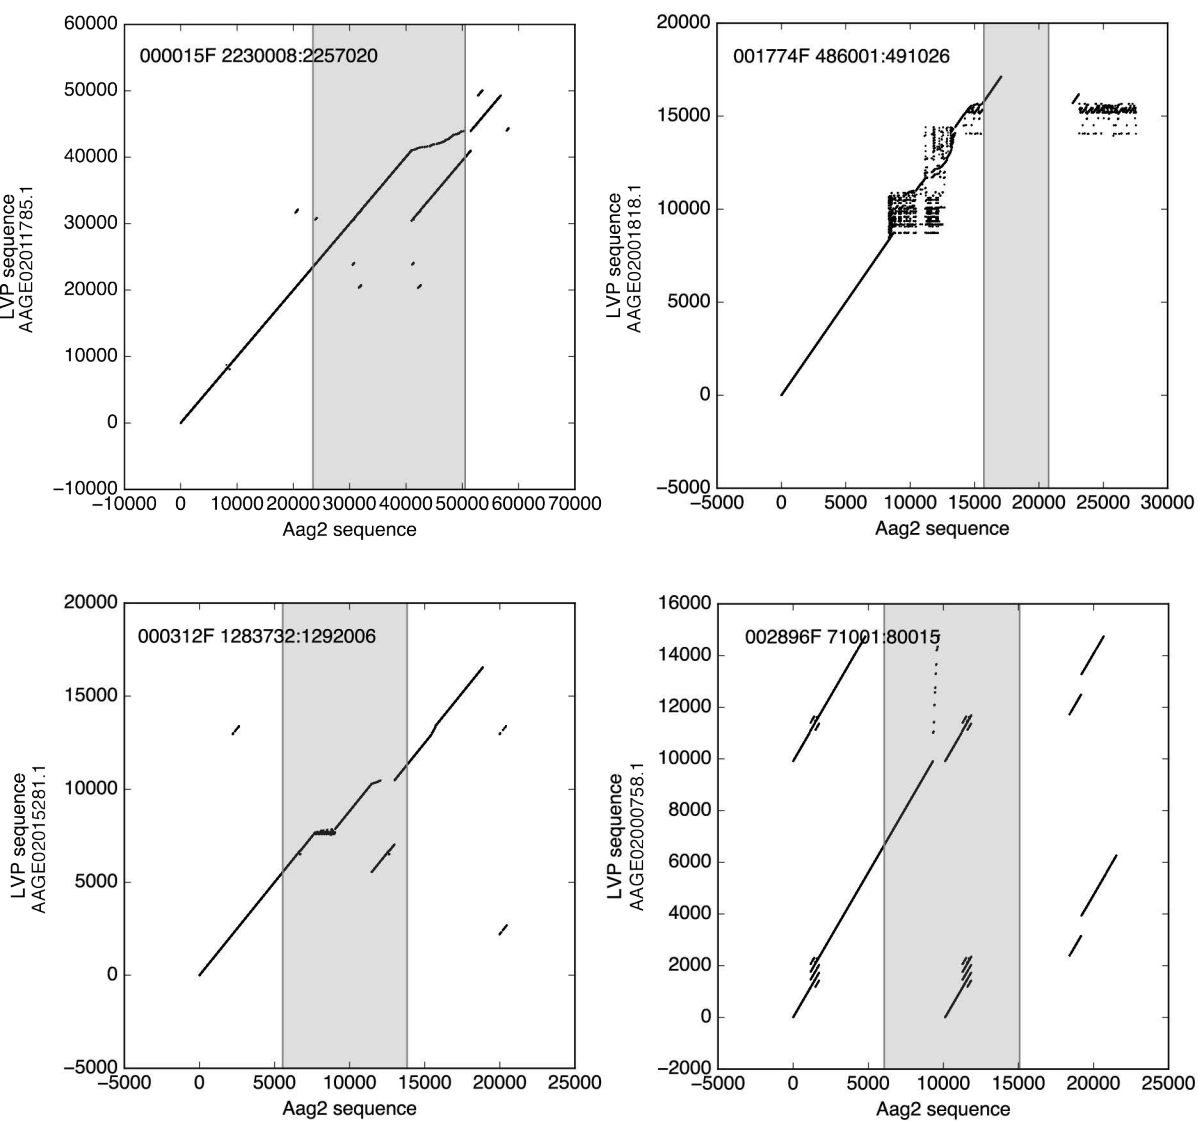

Fig. 2

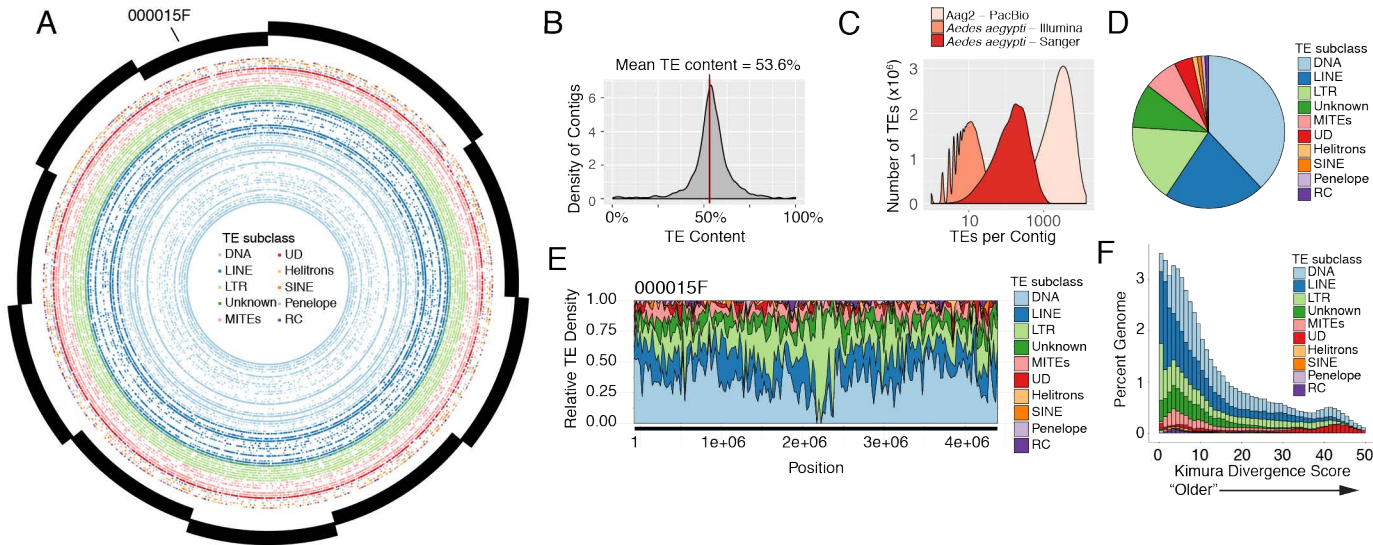



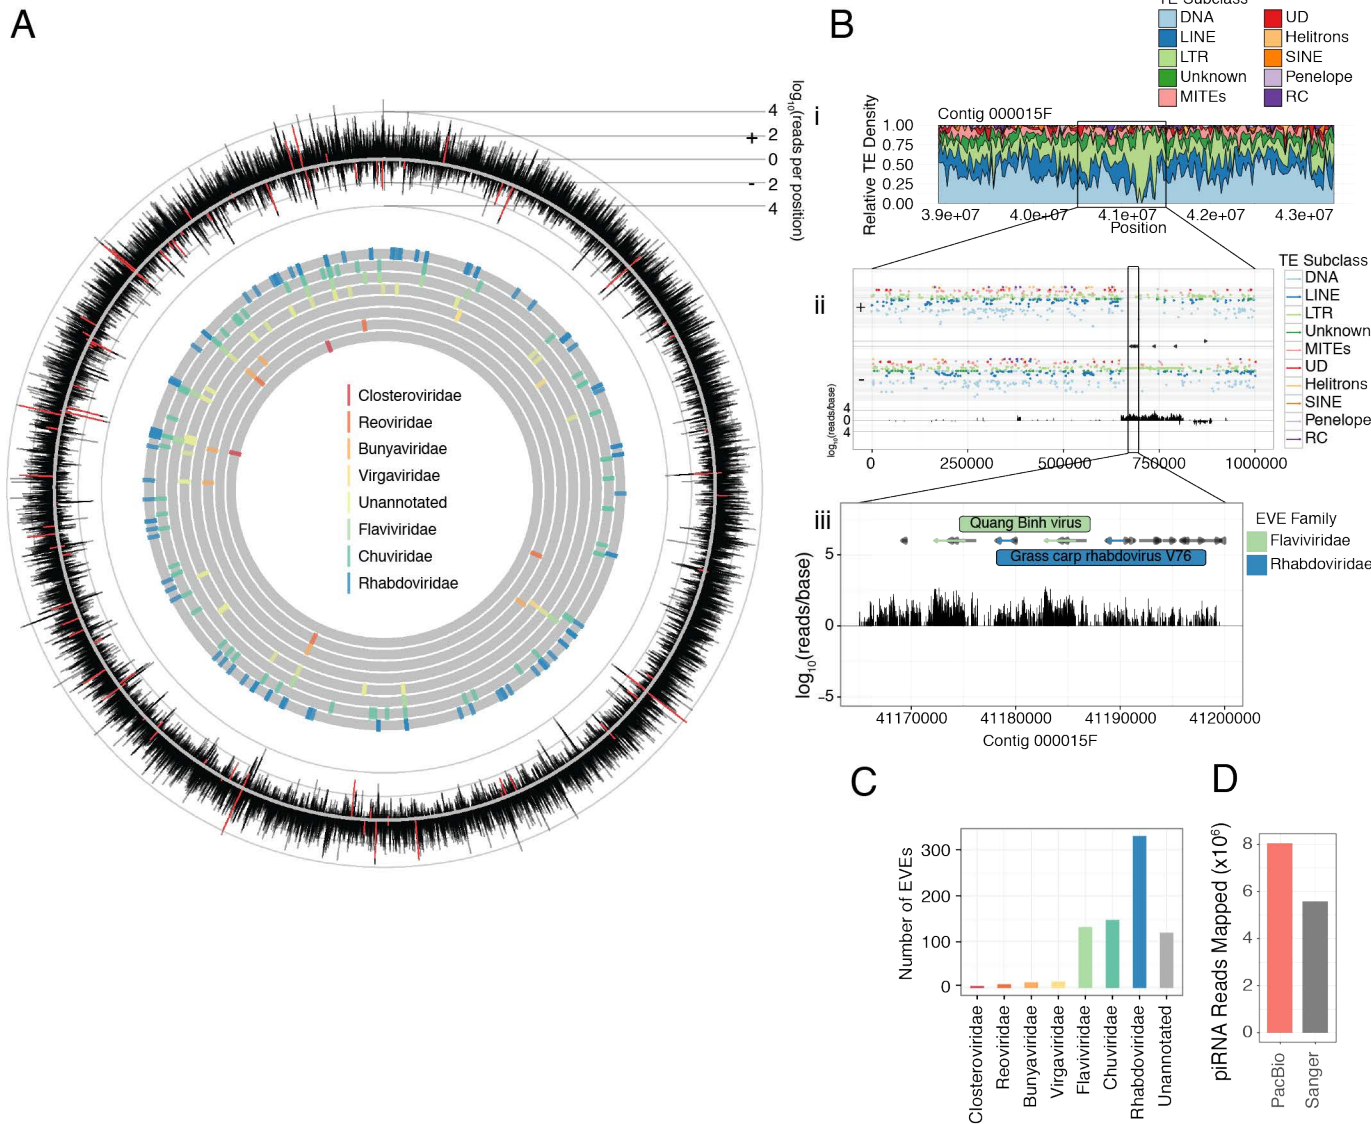

A

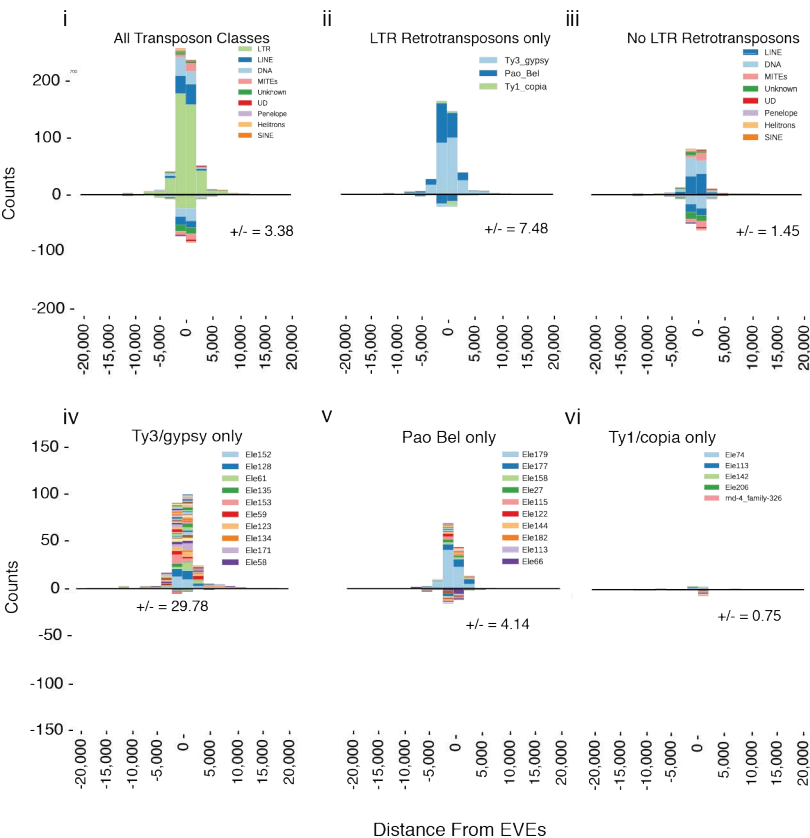

B

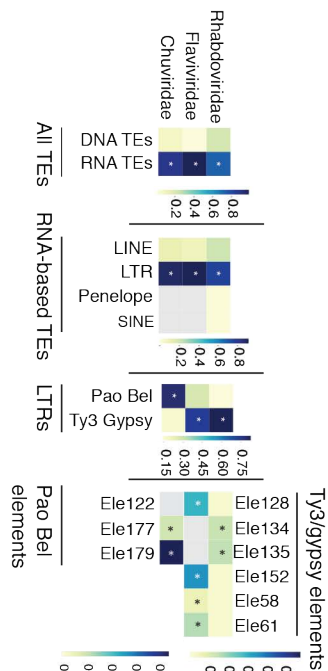

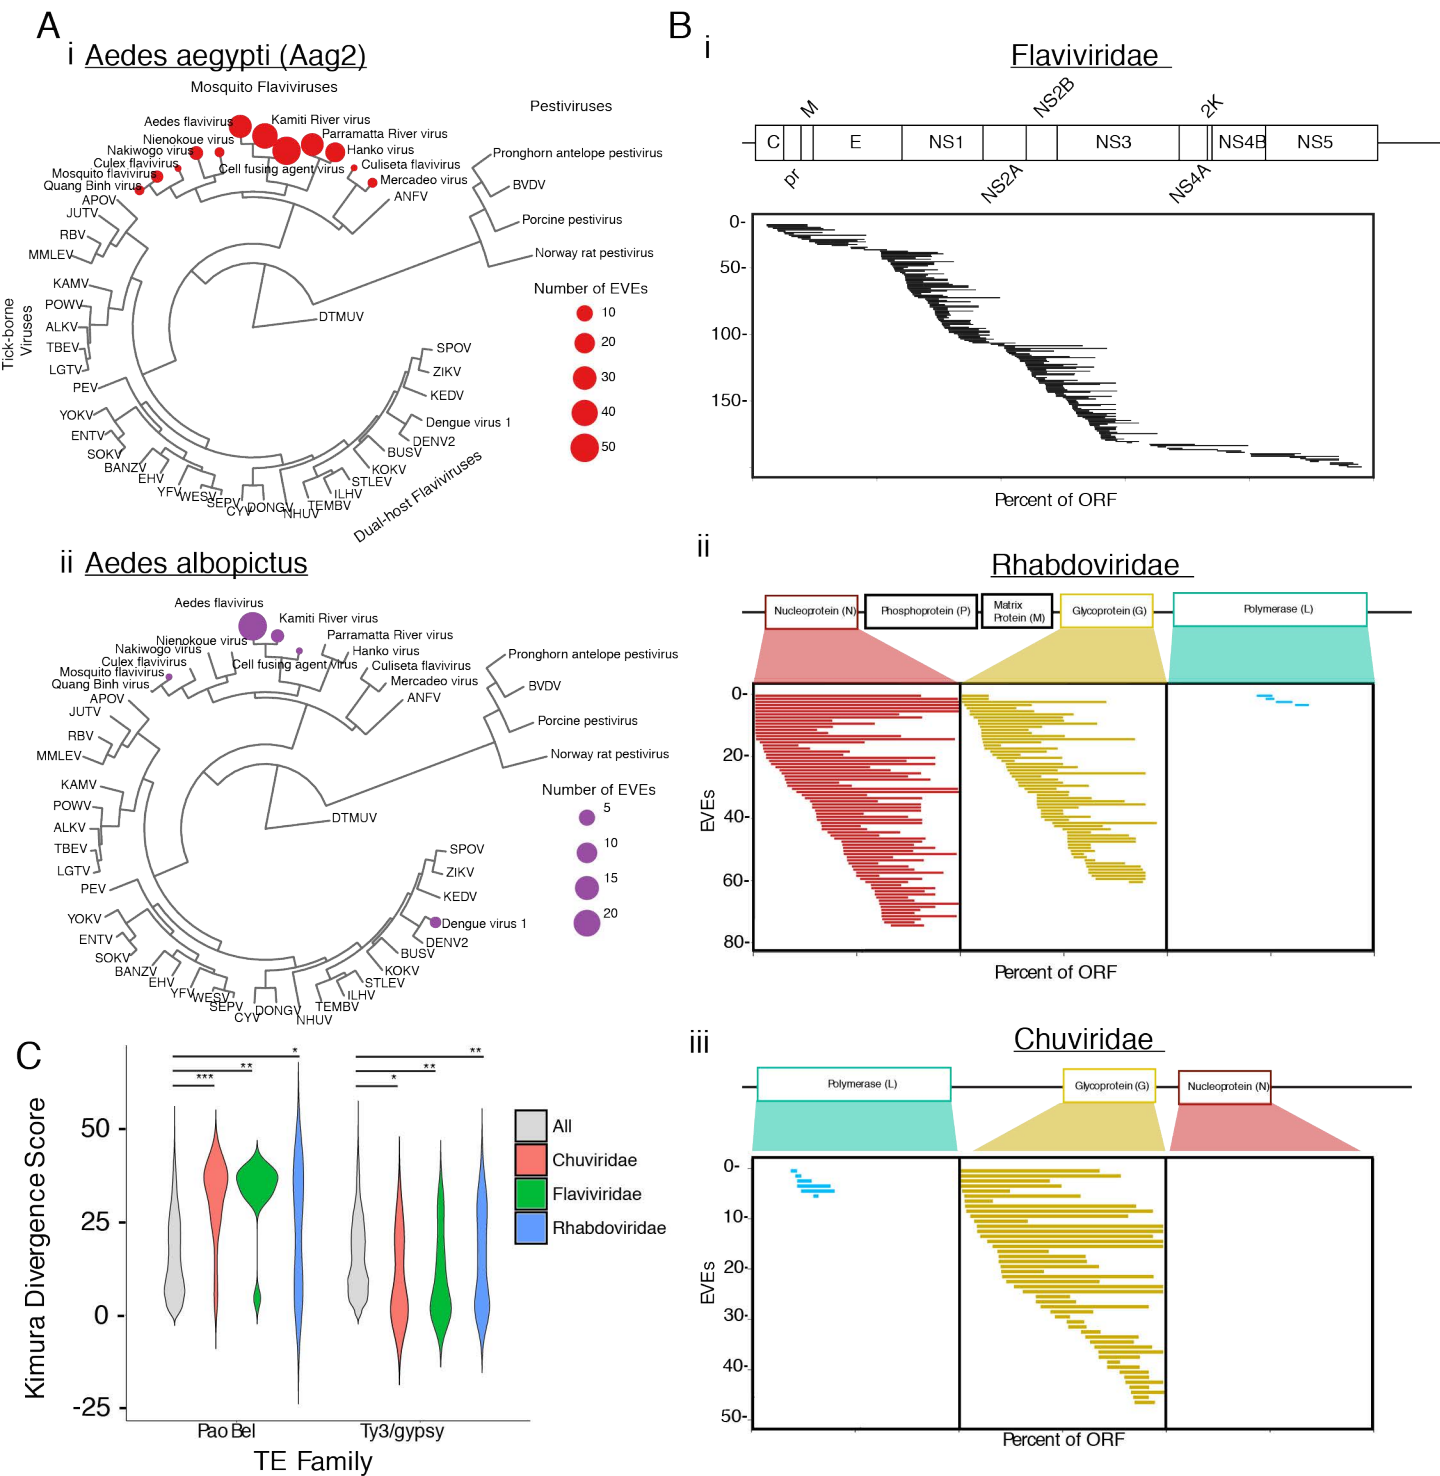

Fig. 2, Suppl 1

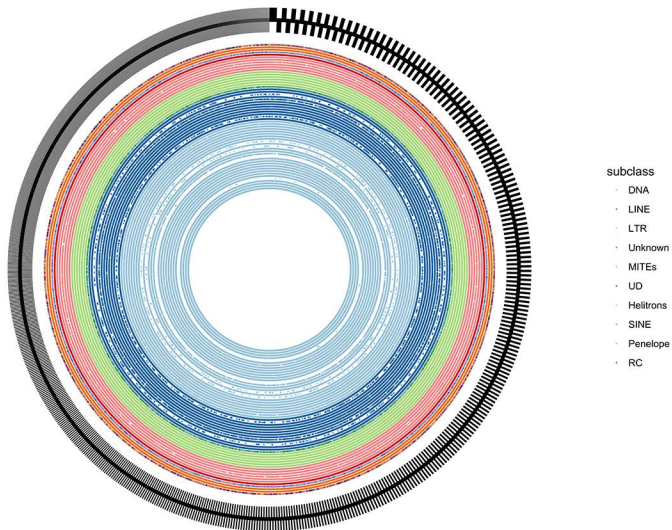

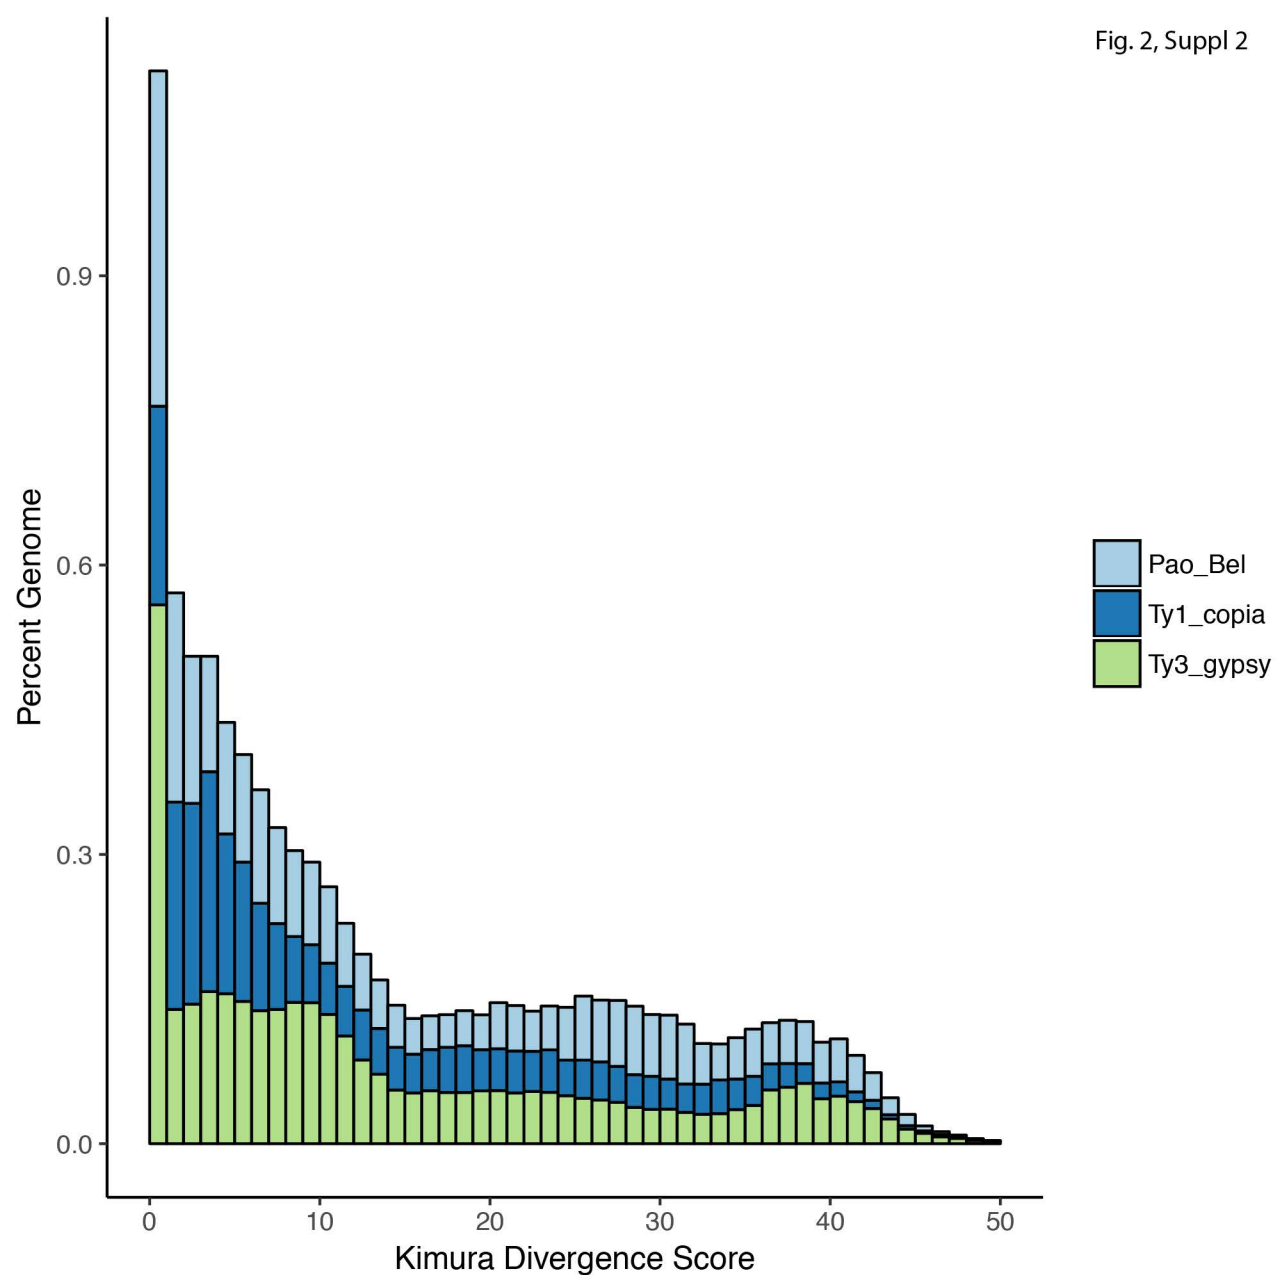



A

# Overlapping TE/EVE pairs

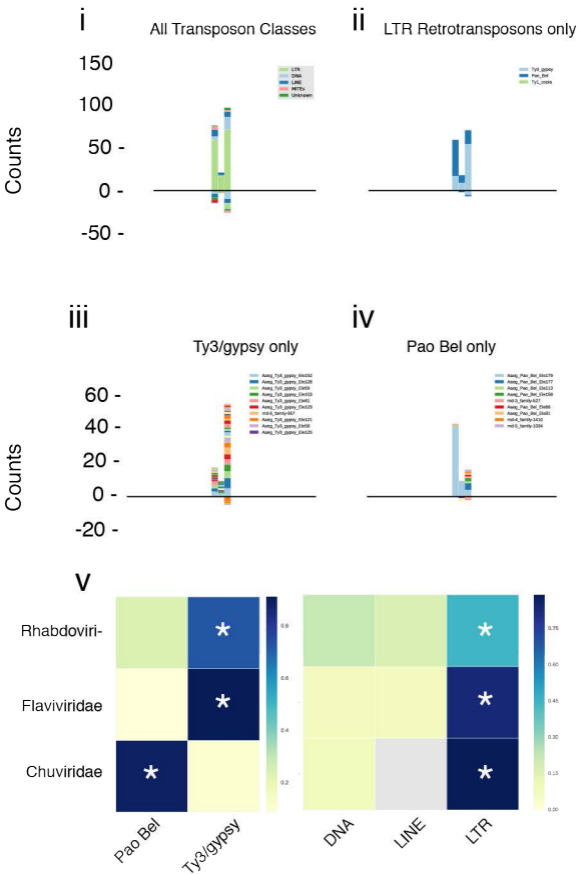



Ty3/gypsy

Pao Bel

All TEs

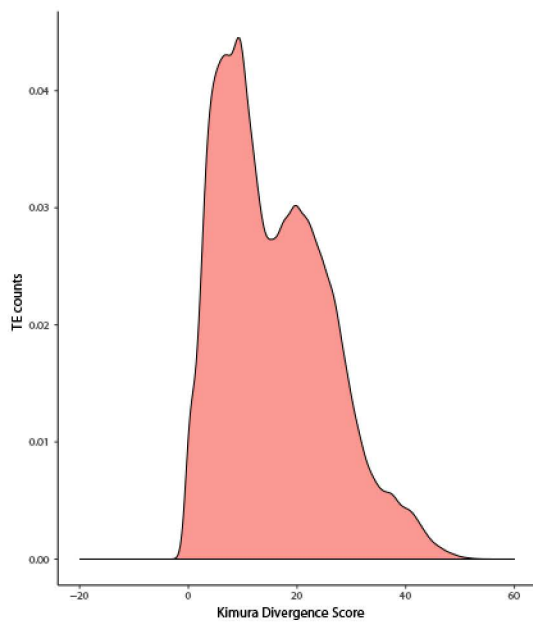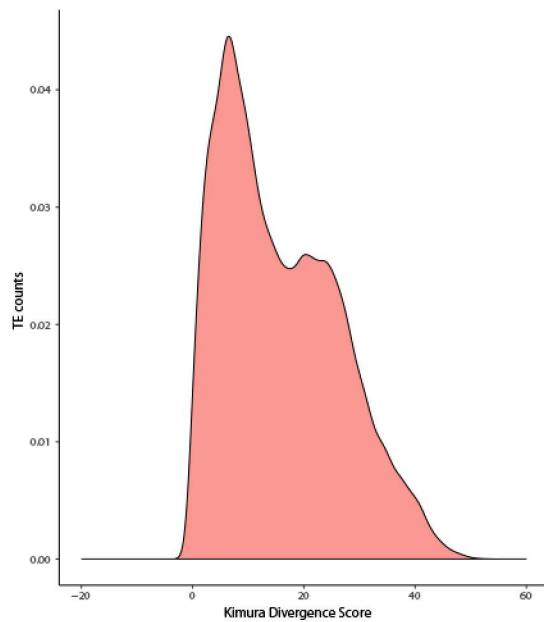

EVE proximal TEs

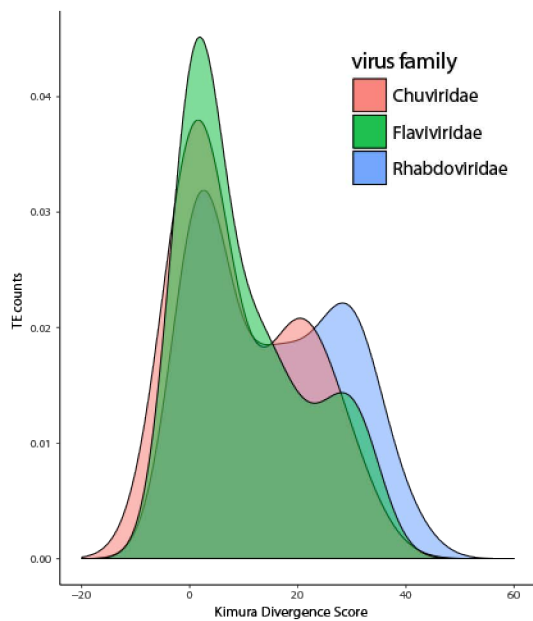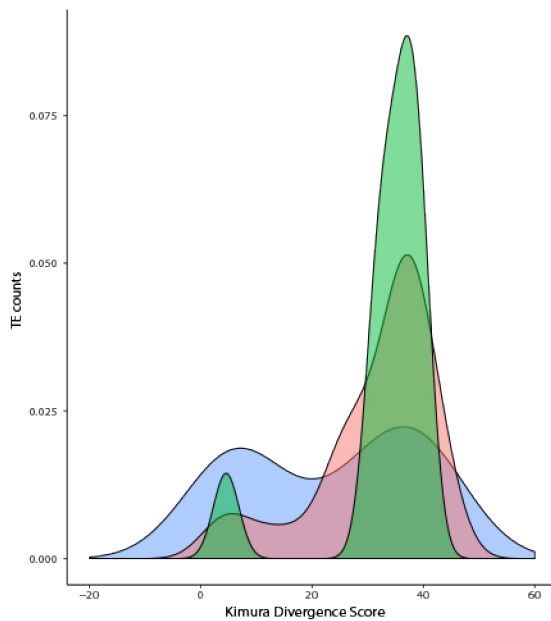

Source: https://www.biorxiv.org/content/10.1101/127498v1.full.pdf
